# Supplementary material for: Evolution of gene expression levels in the male reproductive organs of Anopheles mosquitoes
Source: Life Sci Alliance. 2019 Jan 2;2(1):e201800191. doi: 10.26508/lsa.201800191 (PMC6315087; doi:10.26508/lsa.201800191)
Supplement: Supplementary file 3 [file LSA-2018-00191_TableS3.xlsx]

## Sheet: GO Molecular Function
GO ID	Cluster genes in GO	Count of genes in GO	Count all genes in GO	Enrichment (p-value)	Enrichment (q-value)	GO name	Cluster ID	Annotation
GO:0003723	AGAP004919 AGAP005046 AGAP005802 AGAP005991 AGAP006871 AGAP007580 AGAP001805 AGAP001910 AGAP002306 AGAP002395 AGAP004422 AGAP000952 AGAP011173 AGAP011298 AGAP011706 AGAP011802 AGAP011092 AGAP012284 AGAP009324	19	336	1.74945e-10	2.06435e-08	RNA binding	1	GO:Molecular Function
GO:0003735	AGAP003556 AGAP004887 AGAP004919 AGAP005046 AGAP005131 AGAP005427 AGAP005802 AGAP005991 AGAP006612 AGAP006871 AGAP007580 AGAP001805 AGAP001910 AGAP002122 AGAP002306 AGAP002395 AGAP002437 AGAP003025 AGAP003532 AGAP003538 AGAP004422 AGAP000952 AGAP011173 AGAP009508 AGAP010591 AGAP010592 AGAP010933 AGAP011077 AGAP011298 AGAP011706 AGAP011777 AGAP011802 AGAP011896 AGAP012100 AGAP012138 AGAP012284 AGA…	44	147	5.09763e-56	6.0152e-54	structural constituent of ribosome	1	GO:Molecular Function
GO:0003743	AGAP006459 AGAP011203 AGAP009863	3	29	0.000197126	0.0232609	translation initiation factor activity	1	GO:Molecular Function
GO:0004129	AGAP000109 AGAP007768	2	12	0.000209626	0.0247358	cytochrome-c oxidase activity	1	GO:Molecular Function
GO:0009055	AGAP006936 AGAP000109 AGAP011629	3	35	0.000414582	0.0489206	electron transfer activity	1	GO:Molecular Function
GO:0015078	AGAP005845 AGAP006879 AGAP001138 AGAP000523 AGAP011131	5	21	4.65919e-08	5.49785e-06	hydrogen ion transmembrane transporter activity	1	GO:Molecular Function
GO:0019843	AGAP005802 AGAP006871 AGAP000952 AGAP009508 AGAP009998 AGAP010065	6	21	9.75458e-10	1.15104e-07	rRNA binding	1	GO:Molecular Function
GO:0030170	AGAP000901 AGAP000313 AGAP007939	3	35	0.000414582	0.0489206	pyridoxal phosphate binding	1	GO:Molecular Function
GO:0046933	AGAP005134 AGAP003599 AGAP000523	3	11	3.15603e-06	0.000372412	proton-transporting ATP synthase activity, rotational mechanism	1	GO:Molecular Function
GO:0046961	AGAP005845 AGAP002401 AGAP003153	3	13	6.73097e-06	0.000794254	proton-transporting ATPase activity, rotational mechanism	1	GO:Molecular Function
GO:0004497	AGAP002429 AGAP001039 AGAP008019	3	113	0.000625936	0.0212818	monooxygenase activity	2	GO:Molecular Function
GO:0005506	AGAP002429 AGAP001039 AGAP000284 AGAP008019	4	154	0.000187704	0.00638194	iron ion binding	2	GO:Molecular Function
GO:0016705	AGAP002429 AGAP001039 AGAP000284 AGAP008019	4	121	6.01299e-05	0.00204442	oxidoreductase activity, acting on paired donors, with incorporation or reduction of molecular oxygen	2	GO:Molecular Function
GO:0020037	AGAP002429 AGAP001039 AGAP000284 AGAP008019	4	160	0.000224282	0.0076256	heme binding	2	GO:Molecular Function
GO:0030170	AGAP000327 AGAP009001	2	35	0.00023834	0.00810354	pyridoxal phosphate binding	2	GO:Molecular Function
GO:0004364	AGAP004164 AGAP004378 AGAP009195 AGAP009196	4	26	4.49082e-05	0.00588298	glutathione transferase activity	3	GO:Molecular Function
GO:0008569	AGAP007675 AGAP002009	2	9	0.000295434	0.0387018	ATP-dependent microtubule motor activity, minus-end-directed	3	GO:Molecular Function
GO:0015106	AGAP001531 AGAP004633	2	6	7.28324e-05	0.00954105	bicarbonate transmembrane transporter activity	3	GO:Molecular Function
GO:0015301	AGAP001531 AGAP004633	2	6	7.28324e-05	0.00954105	anion:anion antiporter activity	3	GO:Molecular Function
GO:0016829	AGAP007700 AGAP003688	2	6	7.28324e-05	0.00954105	lyase activity	3	GO:Molecular Function
GO:0019531	AGAP001531 AGAP004633	2	6	7.28324e-05	0.00954105	oxalate transmembrane transporter activity	3	GO:Molecular Function
GO:0045503	AGAP007675 AGAP002009 AGAP011539	3	15	6.93161e-05	0.00908041	dynein light chain binding	3	GO:Molecular Function
GO:0045505	AGAP006887 AGAP007675 AGAP002009 AGAP002100	4	14	1.59285e-06	0.000208664	dynein intermediate chain binding	3	GO:Molecular Function
GO:0051959	AGAP006887 AGAP007675 AGAP002009	3	14	5.14609e-05	0.00674137	dynein light intermediate chain binding	3	GO:Molecular Function
GO:0003688	AGAP007063 AGAP004408 AGAP000978 AGAP011961	4	7	1.20847e-07	2.30818e-05	DNA replication origin binding	4	GO:Molecular Function
GO:0003690	AGAP004319 AGAP010984 AGAP012143 AGAP008874	4	17	2.94996e-05	0.00563442	double-stranded DNA binding	4	GO:Molecular Function
GO:0004521	AGAP004064 AGAP010498	2	6	0.000223209	0.0426329	endoribonuclease activity	4	GO:Molecular Function
GO:0005242	AGAP001283 AGAP028144	2	6	0.000146097	0.0264435	inward rectifier potassium channel activity	5	GO:Molecular Function
GO:0016868	AGAP004399 AGAP008305	2	5	7.41333e-05	0.0134181	intramolecular transferase activity, phosphotransferases	5	GO:Molecular Function
GO:0031072	AGAP001914 AGAP009347	2	6	0.000146097	0.0264435	heat shock protein binding	5	GO:Molecular Function
GO:0051082	AGAP001914 AGAP004002 AGAP010588 AGAP011387 AGAP010051	5	46	0.000271954	0.0492237	unfolded protein binding	5	GO:Molecular Function
GO:0003735	AGAP004818 AGAP006684 AGAP006802 AGAP006953 AGAP002407 AGAP002754 AGAP002921 AGAP003217 AGAP003770 AGAP011931 AGAP000541 AGAP011946 AGAP008405 AGAP008773	14	147	7.32247e-12	6.8099e-10	structural constituent of ribosome	6	GO:Molecular Function
GO:0008312	AGAP002183 AGAP008339	2	7	2.77289e-05	0.00257878	7S RNA binding	6	GO:Molecular Function
GO:0030942	AGAP002183 AGAP008339	2	2	0	0	endoplasmic reticulum signal peptide binding	6	GO:Molecular Function
GO:0003743	AGAP006607 AGAP006613 AGAP002340 AGAP003119 AGAP001380 AGAP011190 AGAP011580 AGAP012140 AGAP012281	9	29	5.21364e-08	1.70486e-05	translation initiation factor activity	7	GO:Molecular Function
GO:0003824	AGAP006360 AGAP006821 AGAP007302 AGAP001899 AGAP001884 AGAP001200 AGAP002518 AGAP002564 AGAP002718 AGAP001312 AGAP001420 AGAP004142 AGAP004396 AGAP004598 AGAP000862 AGAP000022 AGAP010368 AGAP010421 AGAP010428 AGAP010568 AGAP011172 AGAP011800 AGAP011805 AGAP011827 AGAP012053 AGAP007921 AGAP007941 AGAP008086 AGAP008252 AGAP008536 AGAP008749 AGAP009685 AGAP010156	33	333	1.08928e-07	3.56195e-05	catalytic activity	7	GO:Molecular Function
GO:0004069	AGAP004142 AGAP009685	2	2	0	0	L-aspartate:2-oxoglutarate aminotransferase activity	7	GO:Molecular Function
GO:0004175	AGAP004960 AGAP001973 AGAP001995 AGAP010718 AGAP011444 AGAP008816 AGAP008837 AGAP009271	8	19	8.88702e-09	2.90606e-06	endopeptidase activity	7	GO:Molecular Function
GO:0004298	AGAP004960 AGAP001973 AGAP001995 AGAP010718 AGAP011444 AGAP008816 AGAP008837 AGAP009271	8	16	1.21728e-09	3.98051e-07	threonine-type endopeptidase activity	7	GO:Molecular Function
GO:0004739	AGAP004786 AGAP003030	2	3	5.21295e-05	0.0170463	pyruvate dehydrogenase (acetyl-transferring) activity	7	GO:Molecular Function
GO:0004784	AGAP005234 AGAP010517	2	3	5.21295e-05	0.0170463	superoxide dismutase activity	7	GO:Molecular Function
GO:0005198	AGAP004798 AGAP007532 AGAP003021 AGAP001399 AGAP001651 AGAP012185	6	27	4.56604e-05	0.0149309	structural molecule activity	7	GO:Molecular Function
GO:0005506	AGAP005618 AGAP006360 AGAP002182 AGAP002418 AGAP002419 AGAP002464 AGAP002769 AGAP003608 AGAP001507 AGAP000818 AGAP000092 AGAP000877 AGAP012292 AGAP008219 AGAP008020 AGAP009246	16	154	6.43215e-05	0.0210331	iron ion binding	7	GO:Molecular Function
GO:0005525	AGAP007596 AGAP005293 AGAP005393 AGAP006996 AGAP007654 AGAP001802 AGAP002047 AGAP002440 AGAP002931 AGAP003405 AGAP004146 AGAP010875 AGAP011286 AGAP012014 AGAP008419 AGAP009310	16	145	2.97039e-05	0.00971317	GTP binding	7	GO:Molecular Function
GO:0008137	AGAP006456 AGAP007574 AGAP002170 AGAP002889 AGAP003367 AGAP008653 AGAP012705	7	22	7.33418e-07	0.000239828	NADH dehydrogenase (ubiquinone) activity	7	GO:Molecular Function
GO:0008139	AGAP005401 AGAP006942 AGAP001273 AGAP002351 AGAP003769	5	12	2.03546e-06	0.000665595	nuclear localization sequence binding	7	GO:Molecular Function
GO:0008177	AGAP007309 AGAP010429	2	2	0	0	succinate dehydrogenase (ubiquinone) activity	7	GO:Molecular Function
GO:0015293	AGAP006718 AGAP009443	2	3	5.21295e-05	0.0170463	symporter activity	7	GO:Molecular Function
GO:0016491	AGAP004977 AGAP005520 AGAP005618 AGAP005645 AGAP006360 AGAP007309 AGAP007593 AGAP001899 AGAP002170 AGAP002499 AGAP002518 AGAP002652 AGAP002769 AGAP001325 AGAP003167 AGAP003584 AGAP004031 AGAP004197 AGAP004366 AGAP001507 AGAP000818 AGAP000092 AGAP010429 AGAP011050 AGAP011051 AGAP011053 AGAP011824 AGAP012292 AGAP008219 AGAP008667 AGAP008731 AGAP009224 AGAP009945 AGAP010150	34	264	6.74844e-11	2.20674e-08	oxidoreductase activity	7	GO:Molecular Function
GO:0017025	AGAP003008 AGAP003135 AGAP001407 AGAP011174	4	14	0.000108885	0.0356052	TBP-class protein binding	7	GO:Molecular Function
GO:0036402	AGAP003008 AGAP001407 AGAP011174	3	8	0.000120395	0.0393693	proteasome-activating ATPase activity	7	GO:Molecular Function
GO:0046912	AGAP012048 AGAP010156	2	3	5.21295e-05	0.0170463	transferase activity, transferring acyl groups, acyl groups converted into alkyl on transfer	7	GO:Molecular Function
GO:0048037	AGAP001312 AGAP010156	2	3	5.21295e-05	0.0170463	cofactor binding	7	GO:Molecular Function
GO:0048039	AGAP005894 AGAP000618	2	3	5.21295e-05	0.0170463	ubiquinone binding	7	GO:Molecular Function
GO:0051538	AGAP006360 AGAP007309	2	2	0	0	3 iron, 4 sulfur cluster binding	7	GO:Molecular Function
GO:0061608	AGAP005401 AGAP001273	2	3	5.21295e-05	0.0170463	nuclear import signal receptor activity	7	GO:Molecular Function
GO:0003735	AGAP005118 AGAP005947 AGAP002713 AGAP004056 AGAP012030 AGAP009613	6	147	0.000106383	0.00882979	structural constituent of ribosome	8	GO:Molecular Function
GO:0004177	AGAP003475 AGAP008345	2	11	6.17778e-05	0.00512756	aminopeptidase activity	8	GO:Molecular Function
GO:0008235	AGAP003475 AGAP008345	2	11	6.17778e-05	0.00512756	metalloexopeptidase activity	8	GO:Molecular Function
GO:0030145	AGAP003475 AGAP011114	2	11	6.17778e-05	0.00512756	manganese ion binding	8	GO:Molecular Function
GO:0044183	AGAP002759 AGAP008249	2	10	4.51716e-05	0.00374925	protein binding involved in protein folding	8	GO:Molecular Function
GO:0051082	AGAP002759 AGAP008249 AGAP010212	3	46	0.000360322	0.0299067	unfolded protein binding	8	GO:Molecular Function
GO:0003735	AGAP003768 AGAP011424 AGAP008329 AGAP009431 AGAP010163	5	147	0.000166976	0.0120223	structural constituent of ribosome	9	GO:Molecular Function
GO:0004300	AGAP011833 AGAP007784 AGAP010130	3	3	0	0	enoyl-CoA hydratase activity	9	GO:Molecular Function
GO:0051082	AGAP002996 AGAP004212 AGAP004238 AGAP010691	4	46	5.40955e-06	0.000389488	unfolded protein binding	9	GO:Molecular Function
GO:0003810	AGAP009100 AGAP009098	2	3	1.18079e-06	0.000126345	protein-glutamine gamma-glutamyltransferase activity	10	GO:Molecular Function
GO:0004016	AGAP002262 AGAP010436	2	5	1.1624e-05	0.00124377	adenylate cyclase activity	10	GO:Molecular Function
GO:0004099	AGAP000359 AGAP011936	2	3	1.18079e-06	0.000126345	chitin deacetylase activity	10	GO:Molecular Function
GO:0005216	AGAP007086 AGAP000798 AGAP000107 AGAP008435 AGAP012447	5	83	0.000252295	0.0269956	ion channel activity	10	GO:Molecular Function
GO:0005234	AGAP000798 AGAP012447	2	14	0.00039433	0.0421933	extracellularly glutamate-gated ion channel activity	10	GO:Molecular Function
GO:0015171	AGAP000540 AGAP010701	2	12	0.000242086	0.0259032	amino acid transmembrane transporter activity	10	GO:Molecular Function
GO:0038023	AGAP000798 AGAP012447	2	14	0.00039433	0.0421933	signaling receptor activity	10	GO:Molecular Function
GO:0000166	AGAP004708 AGAP001228 AGAP002101 AGAP002300 AGAP002644 AGAP002653 AGAP003003 AGAP012096 AGAP003629 AGAP011133 AGAP000727 AGAP000090 AGAP010644 AGAP010681 AGAP011271 AGAP012115 AGAP007891 AGAP008085 AGAP008184 AGAP008929	20	90	1.13365e-06	0.000516944	nucleotide binding	11	GO:Molecular Function
GO:0004709	AGAP004699 AGAP003202 AGAP013516	3	4	2.6551e-05	0.0121072	MAP kinase kinase kinase activity	11	GO:Molecular Function
GO:0004843	AGAP005540 AGAP007001 AGAP002086 AGAP003853 AGAP012113 AGAP012248	6	12	5.58173e-06	0.00254527	thiol-dependent ubiquitin-specific protease activity	11	GO:Molecular Function
GO:0005488	AGAP004873 AGAP005771 AGAP005892 AGAP006998 AGAP007143 AGAP007683 AGAP001820 AGAP002215 AGAP002597 AGAP002665 AGAP002961 AGAP002970 AGAP001357 AGAP003359 AGAP003548 AGAP003576 AGAP003643 AGAP004300 AGAP001490 AGAP000770 AGAP000161 AGAP000187 AGAP000273 AGAP010643 AGAP011036 AGAP011156 AGAP011162 AGAP011822 AGAP011904 AGAP012134 AGAP007873 AGAP008251 AGAP008392 AGAP008906 AGAP009432 AGAP009571 AGA…	44	197	2.14167e-12	9.766e-10	binding	11	GO:Molecular Function
GO:0005515	AGAP004745 AGAP004884 AGAP005029 AGAP005042 AGAP005053 AGAP005560 AGAP005622 AGAP005632 AGAP005748 AGAP005897 AGAP006132 AGAP006232 AGAP006264 AGAP006357 AGAP006474 AGAP006573 AGAP006574 AGAP006625 AGAP006647 AGAP006747 AGAP006777 AGAP006784 AGAP006885 AGAP006888 AGAP006993 AGAP007027 AGAP007039 AGAP007130 AGAP007217 AGAP007244 AGAP007256 AGAP007332 AGAP007381 AGAP007523 AGAP007592 AGAP010318 AGA…	140	1453	9.79138e-05	0.0446487	protein binding	11	GO:Molecular Function
GO:0005524	AGAP004699 AGAP004708 AGAP004780 AGAP005110 AGAP005521 AGAP005567 AGAP005639 AGAP006205 AGAP006427 AGAP006472 AGAP006569 AGAP006573 AGAP006949 AGAP007504 AGAP007523 AGAP007565 AGAP007592 AGAP007722 AGAP001820 AGAP001858 AGAP001827 AGAP002071 AGAP002101 AGAP002251 AGAP002371 AGAP002608 AGAP002644 AGAP002653 AGAP002693 AGAP013266 AGAP002968 AGAP010336 AGAP003003 AGAP003040 AGAP003202 AGAP003221 AGA…	86	712	5.69364e-07	0.00025963	ATP binding	11	GO:Molecular Function
GO:0005525	AGAP006354 AGAP006474 AGAP006890 AGAP007634 AGAP001902 AGAP002092 AGAP001211 AGAP002185 AGAP002219 AGAP002645 AGAP003018 AGAP003350 AGAP004204 AGAP004227 AGAP004610 AGAP000671 AGAP010510 AGAP010624 AGAP011471 AGAP011532 AGAP011730 AGAP012108 AGAP007998 AGAP009438 AGAP028640	25	145	1.23408e-05	0.00562743	GTP binding	11	GO:Molecular Function
GO:0008536	AGAP005892 AGAP002970 AGAP002982 AGAP003576 AGAP004520 AGAP011156 AGAP011904 AGAP009571 AGAP009921	9	14	2.70539e-09	1.23366e-06	Ran GTPase binding	11	GO:Molecular Function
GO:0008565	AGAP005892 AGAP006139 AGAP007683 AGAP002277 AGAP002970 AGAP003576 AGAP003824 AGAP011057 AGAP011156 AGAP009571 AGAP009840 AGAP009921	12	23	7.36228e-10	3.3572e-07	protein transporter activity	11	GO:Molecular Function
GO:0016887	AGAP005639 AGAP006427 AGAP006472 AGAP007504 AGAP007592 AGAP001858 AGAP002071 AGAP002693 AGAP003221 AGAP003680 AGAP003925 AGAP001523 AGAP000440 AGAP010462 AGAP010700 AGAP011271 AGAP012005 AGAP008085	18	90	1.71189e-05	0.00780621	ATPase activity	11	GO:Molecular Function
GO:0019894	AGAP005042 AGAP000187	2	2	0	0	kinesin binding	11	GO:Molecular Function
GO:0030151	AGAP000698 AGAP000699 AGAP010877	3	4	2.6551e-05	0.0121072	molybdenum ion binding	11	GO:Molecular Function
GO:0035091	AGAP002081 AGAP001110 AGAP003437 AGAP003925 AGAP004487 AGAP011036 AGAP009255 AGAP010687	8	20	4.02295e-06	0.00183446	phosphatidylinositol binding	11	GO:Molecular Function
GO:0070530	AGAP005933 AGAP003853	2	2	0	0	K63-linked polyubiquitin modification-dependent protein binding	11	GO:Molecular Function
GO:0001104	AGAP005906 AGAP005909 AGAP002258 AGAP004361 AGAP011626 AGAP009141 AGAP010034	7	22	7.44251e-05	0.0308864	RNA polymerase II transcription cofactor activity	12	GO:Molecular Function
GO:0001129	AGAP005731 AGAP003882	2	2	0	0	RNA polymerase II transcription factor activity, TBP-class protein binding, involved in preinitiation complex assembly	12	GO:Molecular Function
GO:0002161	AGAP006624 AGAP002014 AGAP003156 AGAP001371	4	7	3.1179e-05	0.0129393	aminoacyl-tRNA editing activity	12	GO:Molecular Function
GO:0003906	AGAP002388 AGAP009587	2	2	0	0	DNA-(apurinic or apyrimidinic site) lyase activity	12	GO:Molecular Function
GO:0004386	AGAP006138 AGAP006599 AGAP007212 AGAP002223 AGAP002687 AGAP002829 AGAP001338 AGAP007953 AGAP008239 AGAP008528	10	25	3.38107e-07	0.000140315	helicase activity	12	GO:Molecular Function
GO:0004706	AGAP002710 AGAP004112	2	2	0	0	JUN kinase kinase kinase activity	12	GO:Molecular Function
GO:0005488	AGAP005033 AGAP005262 AGAP005343 AGAP005438 AGAP005731 AGAP007509 AGAP007568 AGAP001916 AGAP002142 AGAP001286 AGAP002618 AGAP003035 AGAP003434 AGAP003681 AGAP003727 AGAP001442 AGAP004152 AGAP004254 AGAP004523 AGAP001700 AGAP000602 AGAP000223 AGAP000271 AGAP010711 AGAP010793 AGAP011454 AGAP009004 AGAP010308 AGAP028502	29	197	4.50219e-05	0.0186841	binding	12	GO:Molecular Function
GO:0005515	AGAP005583 AGAP005007 AGAP005252 AGAP005262 AGAP005270 AGAP005297 AGAP005429 AGAP005616 AGAP005623 AGAP005631 AGAP005640 AGAP005648 AGAP006092 AGAP006130 AGAP006239 AGAP006281 AGAP006384 AGAP006479 AGAP006528 AGAP006580 AGAP006605 AGAP006608 AGAP006633 AGAP006714 AGAP006811 AGAP006889 AGAP007045 AGAP007128 AGAP007578 AGAP007617 AGAP007626 AGAP006960 AGAP001895 AGAP001888 AGAP001882 AGAP001879 AGA…	170	1453	1.97896e-12	8.21269e-10	protein binding	12	GO:Molecular Function
GO:0017150	AGAP002791 AGAP000856 AGAP009171	3	4	2.39727e-05	0.00994867	tRNA dihydrouridine synthase activity	12	GO:Molecular Function
GO:0019781	AGAP005102 AGAP005544	2	2	0	0	NEDD8 activating enzyme activity	12	GO:Molecular Function
GO:0140078	AGAP002388 AGAP009587	2	2	0	0	class I DNA-(apurinic or apyrimidinic site) lyase activity	12	GO:Molecular Function
GO:0003677	AGAP004956 AGAP005800 AGAP006642 AGAP001854 AGAP001929 AGAP002106 AGAP002394 AGAP002580 AGAP002615 AGAP002669 AGAP002753 AGAP002967 AGAP013180 AGAP003852 AGAP004082 AGAP001158 AGAP001135 AGAP004377 AGAP001537 AGAP001593 AGAP000072 AGAP000071 AGAP001483 AGAP010898 AGAP011246 AGAP011712 AGAP012033 AGAP007775 AGAP008499 AGAP009047 AGAP009088 AGAP009349 AGAP028642 AGAP009807 AGAP010219 AGAP013720 AGA…	37	479	4.59704e-06	0.00105272	DNA binding	13	GO:Molecular Function
GO:0003678	AGAP004956 AGAP005800 AGAP010720 AGAP007775 AGAP010219	5	6	2.15802e-09	4.94186e-07	DNA helicase activity	13	GO:Molecular Function
GO:0003697	AGAP006065 AGAP007126 AGAP002106 AGAP013180 AGAP011538	5	24	0.000166497	0.0381279	single-stranded DNA binding	13	GO:Molecular Function
GO:0005524	AGAP004956 AGAP004957 AGAP005800 AGAP006997 AGAP007126 AGAP007417 AGAP007502 AGAP007706 AGAP001793 AGAP001950 AGAP001223 AGAP002580 AGAP002642 AGAP002967 AGAP001333 AGAP003180 AGAP003323 AGAP013180 AGAP004012 AGAP004057 AGAP001135 AGAP004594 AGAP001537 AGAP009784 AGAP000012 AGAP000390 AGAP010699 AGAP010720 AGAP010898 AGAP028745 AGAP011652 AGAP012245 AGAP012297 AGAP007775 AGAP007798 AGAP008081 AGA…	45	712	9.21389e-05	0.0210998	ATP binding	13	GO:Molecular Function
GO:0008026	AGAP002967 AGAP001537 AGAP028528	3	7	5.39866e-05	0.0123629	ATP-dependent helicase activity	13	GO:Molecular Function
GO:0008094	AGAP002642 AGAP013180 AGAP012245	3	8	0.000104888	0.0240193	DNA-dependent ATPase activity	13	GO:Molecular Function
GO:0009982	AGAP005743 AGAP010807 AGAP012003	3	9	0.00018341	0.0420009	pseudouridine synthase activity	13	GO:Molecular Function
GO:0016300	AGAP006663 AGAP011900	2	3	4.68622e-05	0.0107314	tRNA (uracil) methyltransferase activity	13	GO:Molecular Function
GO:0022857	AGAP005045 AGAP006349 AGAP006595 AGAP007484 AGAP002366 AGAP003303 AGAP004104 AGAP001635 AGAP000732 AGAP010567 AGAP010943 AGAP007859 AGAP009274	13	106	2.6905e-05	0.00616124	transmembrane transporter activity	13	GO:Molecular Function
GO:0030983	AGAP007126 AGAP002642 AGAP012245	3	6	2.38185e-05	0.00545444	mismatched DNA binding	13	GO:Molecular Function
GO:0031593	AGAP004082 AGAP001158	2	3	4.68622e-05	0.0107314	polyubiquitin modification-dependent protein binding	13	GO:Molecular Function
GO:0070182	AGAP011769 AGAP009655	2	2	0	0	DNA polymerase binding	13	GO:Molecular Function
GO:0004497	AGAP006020 AGAP013224 AGAP001861 AGAP002138 AGAP002196 AGAP002202 AGAP002866 AGAP002894 AGAP003065 AGAP001443 AGAP000088 AGAP013490 AGAP000194 AGAP010966 AGAP008205 AGAP008682	16	113	9.48794e-05	0.0223915	monooxygenase activity	14	GO:Molecular Function
GO:0004828	AGAP013209 AGAP000991	2	3	0.000150046	0.0354108	serine-tRNA ligase activity	14	GO:Molecular Function
GO:0004930	AGAP004930 AGAP005002 AGAP002519 AGAP004034 AGAP004123 AGAP004222 AGAP000115 AGAP000369 AGAP000445 AGAP009514 AGAP011646 AGAP012164 AGAP012378 AGAP010089 AGAP012578 AGAP007136	16	110	6.7213e-05	0.0158623	G-protein coupled receptor activity	14	GO:Molecular Function
GO:0004984	AGAP005495 AGAP006167 AGAP006450 AGAP006666 AGAP006717 AGAP001915 AGAP001912 AGAP002125 AGAP001117 AGAP001171 AGAP011467 AGAP011991 AGAP008114 AGAP009256 AGAP009410 AGAP009640 AGAP010195	17	125	0.000106674	0.0251751	olfactory receptor activity	14	GO:Molecular Function
GO:0005344	AGAP012257 AGAP008434	2	3	0.000150046	0.0354108	oxygen carrier activity	14	GO:Molecular Function
GO:0005506	AGAP006020 AGAP013224 AGAP001861 AGAP002138 AGAP002196 AGAP002202 AGAP002866 AGAP002864 AGAP002894 AGAP003065 AGAP001443 AGAP000088 AGAP013490 AGAP000091 AGAP000194 AGAP010966 AGAP008205 AGAP008358 AGAP008682	19	154	0.000193193	0.0455937	iron ion binding	14	GO:Molecular Function
GO:0005549	AGAP005495 AGAP006167 AGAP006368 AGAP006666 AGAP007289 AGAP001912 AGAP002025 AGAP002125 AGAP002556 AGAP002905 AGAP001409 AGAP011467 AGAP011991 AGAP012318 AGAP008114 AGAP008281 AGAP008398 AGAP009410 AGAP009640	19	150	0.000134451	0.0317304	odorant binding	14	GO:Molecular Function
GO:0008469	AGAP006938 AGAP003923 AGAP009048	3	5	3.80792e-05	0.00898669	histone-arginine N-methyltransferase activity	14	GO:Molecular Function
GO:0016705	AGAP013224 AGAP001861 AGAP002138 AGAP002196 AGAP002202 AGAP002866 AGAP002864 AGAP002894 AGAP003065 AGAP001443 AGAP000088 AGAP013490 AGAP000194 AGAP010966 AGAP008205 AGAP008358 AGAP008682	17	121	6.9332e-05	0.0163623	oxidoreductase activity, acting on paired donors, with incorporation or reduction of molecular oxygen	14	GO:Molecular Function
GO:0019825	AGAP012257 AGAP008434	2	3	0.000150046	0.0354108	oxygen binding	14	GO:Molecular Function
GO:0020037	AGAP013224 AGAP001861 AGAP002138 AGAP002196 AGAP002202 AGAP002866 AGAP002864 AGAP002894 AGAP003065 AGAP000214 AGAP001443 AGAP003714 AGAP000088 AGAP013490 AGAP000194 AGAP000051 AGAP010734 AGAP010966 AGAP012257 AGAP011216 AGAP008205 AGAP008358 AGAP008434 AGAP008682	24	160	1.14834e-06	0.000271007	heme binding	14	GO:Molecular Function
GO:0035241	AGAP006938 AGAP003923	2	2	0	0	protein-arginine omega-N monomethyltransferase activity	14	GO:Molecular Function
GO:0000213	AGAP007591 AGAP009485	2	3	1.37599e-05	0.00228415	tRNA-intron endonuclease activity	15	GO:Molecular Function
GO:0004169	AGAP002674 AGAP010784	2	3	1.37599e-05	0.00228415	dolichyl-phosphate-mannose-protein mannosyltransferase activity	15	GO:Molecular Function
GO:0004518	AGAP007591 AGAP002220 AGAP009485 AGAP009607	4	14	1.30314e-05	0.00216322	nuclease activity	15	GO:Molecular Function
GO:0003735	AGAP004919 AGAP005131 AGAP005947 AGAP002407 AGAP002754 AGAP002921 AGAP003768 AGAP000541 AGAP028693 AGAP011424 AGAP011896 AGAP011946 AGAP008329 AGAP009431 AGAP010163 AGAP011635	16	147	4.95785e-10	7.58551e-08	structural constituent of ribosome	MAGs Highly Variable	GO:Molecular Function
GO:0003756	AGAP007393 AGAP007491 AGAP000044 AGAP012407	4	10	3.21017e-07	4.91155e-05	protein disulfide isomerase activity	MAGs Highly Variable	GO:Molecular Function
GO:0004300	AGAP011833 AGAP010130	2	3	4.86156e-06	0.000743819	enoyl-CoA hydratase activity	MAGs Highly Variable	GO:Molecular Function
GO:0016853	AGAP007393 AGAP012407	2	6	9.36052e-05	0.0143216	isomerase activity	MAGs Highly Variable	GO:Molecular Function
GO:0019205	AGAP003968 AGAP009319	2	5	4.73988e-05	0.00725202	nucleobase-containing compound kinase activity	MAGs Highly Variable	GO:Molecular Function
GO:0051082	AGAP001914 AGAP002996 AGAP001424 AGAP004238 AGAP001502	5	46	0.000120535	0.0184418	unfolded protein binding	MAGs Highly Variable	GO:Molecular Function
GO:0003735	AGAP004919 AGAP005947 AGAP002122 AGAP002754 AGAP003768 AGAP000654 AGAP000655 AGAP000541 AGAP028693 AGAP011424 AGAP011687 AGAP011896 AGAP008329 AGAP008405 AGAP009431 AGAP010163	16	147	1.03514e-08	1.64588e-06	structural constituent of ribosome	Testes Highly Variable	GO:Molecular Function
GO:0003743	AGAP006130 AGAP007668 AGAP002525 AGAP011580	4	29	0.000294841	0.0468798	translation initiation factor activity	Testes Highly Variable	GO:Molecular Function
GO:0003746	AGAP000883 AGAP009737 AGAP004235	3	10	3.47166e-05	0.00551995	translation elongation factor activity	Testes Highly Variable	GO:Molecular Function
GO:0003756	AGAP007393 AGAP000044 AGAP012407	3	10	3.47166e-05	0.00551995	protein disulfide isomerase activity	Testes Highly Variable	GO:Molecular Function
GO:0004300	AGAP011833 AGAP010130	2	3	8.87623e-06	0.00141132	enoyl-CoA hydratase activity	Testes Highly Variable	GO:Molecular Function
GO:0004826	AGAP003517 AGAP011472	2	4	3.49574e-05	0.00555822	phenylalanine-tRNA ligase activity	Testes Highly Variable	GO:Molecular Function
GO:0016853	AGAP007393 AGAP012407	2	6	0.000169445	0.0269417	isomerase activity	Testes Highly Variable	GO:Molecular Function
GO:0030145	AGAP001952 AGAP003475 AGAP011114	3	11	5.36638e-05	0.00853254	manganese ion binding	Testes Highly Variable	GO:Molecular Function
GO:0044183	AGAP003477 AGAP004238 AGAP010588	3	10	3.47166e-05	0.00551995	protein binding involved in protein folding	Testes Highly Variable	GO:Molecular Function
GO:0051082	AGAP001914 AGAP002996 AGAP003477 AGAP001424 AGAP004238 AGAP001502 AGAP010588 AGAP010212	8	46	3.5729e-07	5.68091e-05	unfolded protein binding	Testes Highly Variable	GO:Molecular Function
GO:0051087	AGAP001914 AGAP001502 AGAP008539	3	13	0.000112509	0.0178889	chaperone binding	Testes Highly Variable	GO:Molecular Function
GO:0070181	AGAP005947 AGAP000655	2	6	0.000169445	0.0269417	small ribosomal subunit rRNA binding	Testes Highly Variable	GO:Molecular Function

## Sheet: GO Cellular Component
GO ID	Cluster genes in GO	Count of genes in GO	Count all genes in GO	Enrichment (p-value)	Enrichment (q-value)	GO name	Cluster ID	Annotation
GO:0000276	AGAP006879 AGAP001138 AGAP000523 AGAP011131	4	9	1.21384e-08	5.34091e-07	mitochondrial proton-transporting ATP synthase complex, coupling factor F(o)	1	GO:Cellular Component
GO:0005622	AGAP003556 AGAP004887 AGAP004919 AGAP005046 AGAP005131 AGAP005427 AGAP005802 AGAP005991 AGAP006612 AGAP006871 AGAP007120 AGAP007580 AGAP001805 AGAP002122 AGAP002395 AGAP002437 AGAP003025 AGAP003532 AGAP003538 AGAP004422 AGAP000952 AGAP009508 AGAP010592 AGAP011077 AGAP011777 AGAP011802 AGAP011896 AGAP012056 AGAP012100 AGAP012138 AGAP007740 AGAP007904 AGAP009031 AGAP009324 AGAP009920 AGAP009998	36	332	1.80162e-28	7.92714e-27	intracellular	1	GO:Cellular Component
GO:0005743	AGAP006099 AGAP006782 AGAP013333 AGAP008955 AGAP010039	5	73	9.48661e-05	0.00417411	mitochondrial inner membrane	1	GO:Cellular Component
GO:0005750	AGAP006936 AGAP000935	2	7	3.46148e-05	0.00152305	mitochondrial respiratory chain complex III	1	GO:Cellular Component
GO:0005765	AGAP005845 AGAP003153	2	18	0.000743625	0.0327195	lysosomal membrane	1	GO:Cellular Component
GO:0005840	AGAP003556 AGAP004887 AGAP004919 AGAP005046 AGAP005131 AGAP005427 AGAP005802 AGAP005991 AGAP006612 AGAP006871 AGAP007580 AGAP001805 AGAP001910 AGAP002122 AGAP002306 AGAP002395 AGAP002437 AGAP003025 AGAP003532 AGAP003538 AGAP004422 AGAP000952 AGAP011173 AGAP009508 AGAP010591 AGAP010592 AGAP010933 AGAP011077 AGAP011777 AGAP011802 AGAP011896 AGAP012100 AGAP012138 AGAP012284 AGAP007740 AGAP009031 AGA…	42	122	1.46146e-56	6.43041e-55	ribosome	1	GO:Cellular Component
GO:0015934	AGAP005802 AGAP011298 AGAP011706 AGAP010257	4	9	1.21384e-08	5.34091e-07	large ribosomal subunit	1	GO:Cellular Component
GO:0015935	AGAP001910 AGAP010591 AGAP011777	3	11	3.15603e-06	0.000138865	small ribosomal subunit	1	GO:Cellular Component
GO:0022625	AGAP004919 AGAP005046 AGAP005427 AGAP005802 AGAP005991 AGAP006612 AGAP007580 AGAP001805 AGAP002122 AGAP002306 AGAP002395 AGAP003025 AGAP003538 AGAP004422 AGAP000952 AGAP011173 AGAP011298 AGAP011706 AGAP011802 AGAP011896 AGAP012138 AGAP012284 AGAP007740 AGAP009324 AGAP010065 AGAP010252	26	45	1.49767e-43	6.58977e-42	cytosolic large ribosomal subunit	1	GO:Cellular Component
GO:0022627	AGAP004887 AGAP005131 AGAP006871 AGAP001910 AGAP002437 AGAP010591 AGAP010592 AGAP010933 AGAP011077 AGAP011777 AGAP012100 AGAP009998	12	33	3.25226e-18	1.43099e-16	cytosolic small ribosomal subunit	1	GO:Cellular Component
GO:0030686	AGAP010592 AGAP011777	2	9	8.18465e-05	0.00360125	90S preribosome	1	GO:Cellular Component
GO:0033180	AGAP005845 AGAP002884 AGAP003153	3	6	1.49237e-07	6.56641e-06	proton-transporting V-type ATPase, V1 domain	1	GO:Cellular Component
GO:0070469	AGAP008955 AGAP010039	2	8	5.49724e-05	0.00241879	respiratory chain	1	GO:Cellular Component
GO:0005930	AGAP001293 AGAP009594	2	12	0.000747349	0.0328834	axoneme	3	GO:Cellular Component
GO:0030286	AGAP006887 AGAP007675 AGAP002009	3	16	9.12923e-05	0.00401686	dynein complex	3	GO:Cellular Component
GO:0031463	AGAP003895 AGAP009641	2	10	0.000417188	0.0183563	Cul3-RING ubiquitin ligase complex	3	GO:Cellular Component
GO:0036126	AGAP007334 AGAP008275 AGAP010031	3	4	5.81563e-08	2.55888e-06	sperm flagellum	3	GO:Cellular Component
GO:0036157	AGAP007675 AGAP011539	2	6	7.28324e-05	0.00320463	outer dynein arm	3	GO:Cellular Component
GO:0000124	AGAP005116 AGAP006621 AGAP004085	3	10	4.99782e-05	0.00579747	SAGA complex	4	GO:Cellular Component
GO:0000243	AGAP007246 AGAP012250	2	6	0.000223209	0.0258922	commitment complex	4	GO:Cellular Component
GO:0000439	AGAP010559 AGAP010984	2	6	0.000223209	0.0258922	core TFIIH complex	4	GO:Cellular Component
GO:0000808	AGAP007063 AGAP000978	2	3	1.17468e-05	0.00136263	origin recognition complex	4	GO:Cellular Component
GO:0000814	AGAP004755 AGAP011497	2	3	1.17468e-05	0.00136263	ESCRT II complex	4	GO:Cellular Component
GO:0005634	AGAP004965 AGAP005129 AGAP005269 AGAP005321 AGAP005643 AGAP005874 AGAP005917 AGAP006386 AGAP006388 AGAP006699 AGAP007063 AGAP007125 AGAP007481 AGAP007701 AGAP002062 AGAP002111 AGAP002301 AGAP002686 AGAP001314 AGAP013394 AGAP003228 AGAP003242 AGAP003594 AGAP003979 AGAP004011 AGAP001143 AGAP004319 AGAP004337 AGAP004408 AGAP003062 AGAP000627 AGAP000978 AGAP010984 AGAP011345 AGAP011844 AGAP008002 AGA…	43	1065	8.40862e-05	0.009754	nucleus	4	GO:Cellular Component
GO:0005664	AGAP007063 AGAP000978	2	5	0.000113524	0.0131687	nuclear origin of replication recognition complex	4	GO:Cellular Component
GO:0005675	AGAP010559 AGAP010984	2	6	0.000223209	0.0258922	holo TFIIH complex	4	GO:Cellular Component
GO:0005689	AGAP007246 AGAP012250 AGAP008122	3	13	0.000161176	0.0186964	U12-type spliceosomal complex	4	GO:Cellular Component
GO:0005739	AGAP004722 AGAP006470 AGAP007206 AGAP013351 AGAP001134 AGAP000565 AGAP000843 AGAP011448 AGAP011945 AGAP012309 AGAP007893 AGAP009737	12	175	0.000189026	0.021927	mitochondrion	4	GO:Cellular Component
GO:0071011	AGAP007246 AGAP002305 AGAP000977 AGAP012250	4	22	0.000114304	0.0132593	precatalytic spliceosome	4	GO:Cellular Component
GO:0097526	AGAP007246 AGAP008122	2	6	0.000223209	0.0258922	spliceosomal tri-snRNP complex	4	GO:Cellular Component
GO:0005744	AGAP001108 AGAP004657	2	5	7.41333e-05	0.00667199	mitochondrial inner membrane presequence translocase complex	5	GO:Cellular Component
GO:0031080	AGAP011887 AGAP012362	2	5	7.41333e-05	0.00667199	nuclear pore outer ring	5	GO:Cellular Component
GO:0005665	AGAP007810 AGAP010064	2	11	0.000127161	0.00673952	DNA-directed RNA polymerase II, core complex	6	GO:Cellular Component
GO:0005762	AGAP006684 AGAP003770 AGAP011946 AGAP012195	4	22	1.58241e-06	8.38675e-05	mitochondrial large ribosomal subunit	6	GO:Cellular Component
GO:0005763	AGAP004818 AGAP006802 AGAP002407 AGAP003217 AGAP011931	5	15	2.88799e-09	1.53063e-07	mitochondrial small ribosomal subunit	6	GO:Cellular Component
GO:0005783	AGAP007168 AGAP002183 AGAP004330 AGAP001732	4	69	0.000474208	0.025133	endoplasmic reticulum	6	GO:Cellular Component
GO:0005786	AGAP002183 AGAP008339	2	7	2.77289e-05	0.00146963	signal recognition particle, endoplasmic reticulum targeting	6	GO:Cellular Component
GO:0005840	AGAP004818 AGAP002407 AGAP002754 AGAP002921 AGAP003217 AGAP000541 AGAP008405 AGAP008773	8	122	2.18153e-06	0.000115621	ribosome	6	GO:Cellular Component
GO:0016514	AGAP005336 AGAP000923	2	5	8.03284e-06	0.00042574	SWI/SNF complex	6	GO:Cellular Component
GO:0071564	AGAP005336 AGAP000923	2	3	8.14477e-07	4.31673e-05	npBAF complex	6	GO:Cellular Component
GO:0071565	AGAP005336 AGAP000923	2	3	8.14477e-07	4.31673e-05	nBAF complex	6	GO:Cellular Component
GO:0097361	AGAP005422 AGAP000444	2	2	0	0	CIA complex	6	GO:Cellular Component
GO:0000159	AGAP004096 AGAP004502	2	3	5.21295e-05	0.00808007	protein phosphatase type 2A complex	7	GO:Cellular Component
GO:0000220	AGAP003711 AGAP001587	2	3	5.21295e-05	0.00808007	vacuolar proton-transporting V-type ATPase, V0 domain	7	GO:Cellular Component
GO:0005737	AGAP004960 AGAP005234 AGAP005293 AGAP005401 AGAP005535 AGAP005576 AGAP005618 AGAP005655 AGAP005672 AGAP005749 AGAP006360 AGAP006607 AGAP006613 AGAP006615 AGAP006937 AGAP006942 AGAP001958 AGAP001973 AGAP001995 AGAP002169 AGAP001273 AGAP002464 AGAP002518 AGAP002969 AGAP003008 AGAP001341 AGAP003397 AGAP003405 AGAP001407 AGAP001399 AGAP003615 AGAP003769 AGAP003857 AGAP004164 AGAP004332 AGAP004394 AGA…	61	749	2.78268e-09	4.31316e-07	cytoplasm	7	GO:Cellular Component
GO:0005739	AGAP004786 AGAP006096 AGAP006821 AGAP006963 AGAP007574 AGAP007654 AGAP001884 AGAP002166 AGAP002499 AGAP002518 AGAP003030 AGAP003200 AGAP004159 AGAP000897 AGAP010568 AGAP011286 AGAP012191 AGAP007786 AGAP008086 AGAP009685 AGAP010150	21	175	6.28892e-07	9.74783e-05	mitochondrion	7	GO:Cellular Component
GO:0005747	AGAP006456 AGAP006918 AGAP007082 AGAP002170 AGAP003367 AGAP011130 AGAP008653 AGAP009072 AGAP009865 AGAP012705	10	21	4.5624e-11	7.07172e-09	mitochondrial respiratory chain complex I	7	GO:Cellular Component
GO:0005749	AGAP000618 AGAP010429	2	3	5.21295e-05	0.00808007	mitochondrial respiratory chain complex II, succinate dehydrogenase complex (ubiquinone)	7	GO:Cellular Component
GO:0005789	AGAP007175 AGAP002769 AGAP003553 AGAP004146 AGAP001721 AGAP000626 AGAP000092 AGAP010557 AGAP007843	9	71	0.000292941	0.0454058	endoplasmic reticulum membrane	7	GO:Cellular Component
GO:0005839	AGAP004960 AGAP001973 AGAP001995 AGAP010718 AGAP011444 AGAP008816 AGAP008837 AGAP009271	8	16	1.21728e-09	1.88679e-07	proteasome core complex	7	GO:Cellular Component
GO:0005852	AGAP006607 AGAP006613 AGAP002340 AGAP011580 AGAP012140 AGAP012281	6	13	1.39364e-07	2.16015e-05	eukaryotic translation initiation factor 3 complex	7	GO:Cellular Component
GO:0008540	AGAP003008 AGAP001407 AGAP002481 AGAP011174	4	13	7.22129e-05	0.011193	proteasome regulatory particle, base subcomplex	7	GO:Cellular Component
GO:0008541	AGAP005535 AGAP002606 AGAP001651	3	7	6.20344e-05	0.00961533	proteasome regulatory particle, lid subcomplex	7	GO:Cellular Component
GO:0015629	AGAP007525 AGAP007532 AGAP008895 AGAP008908	4	12	4.58466e-05	0.00710623	actin cytoskeleton	7	GO:Cellular Component
GO:0016021	AGAP004787 AGAP005121 AGAP005520 AGAP005529 AGAP005775 AGAP005948 AGAP005971 AGAP006040 AGAP006243 AGAP006546 AGAP028621 AGAP006615 AGAP006718 AGAP006962 AGAP006963 AGAP007113 AGAP007119 AGAP007175 AGAP007538 AGAP007567 AGAP007633 AGAP007653 AGAP007667 AGAP007711 AGAP007713 AGAP001791 AGAP001802 AGAP001810 AGAP002028 AGAP002047 AGAP002093 AGAP002113 AGAP002166 AGAP002278 AGAP002328 AGAP002396 AGA…	131	2542	2.59068e-05	0.00401555	integral component of membrane	7	GO:Cellular Component
GO:0016471	AGAP004867 AGAP003711 AGAP001587 AGAP000721	4	7	1.4214e-06	0.000220317	vacuolar proton-transporting V-type ATPase complex	7	GO:Cellular Component
GO:0019773	AGAP004960 AGAP001973 AGAP001995 AGAP008816	4	7	1.4214e-06	0.000220317	proteasome core complex, alpha-subunit complex	7	GO:Cellular Component
GO:0030126	AGAP004798 AGAP001399 AGAP010719	3	6	2.73984e-05	0.00424675	COPI vesicle coat	7	GO:Cellular Component
GO:0031595	AGAP005535 AGAP003008 AGAP001407 AGAP011174	4	9	8.0106e-06	0.00124164	nuclear proteasome complex	7	GO:Cellular Component
GO:0031597	AGAP003008 AGAP001407 AGAP011174	3	8	0.000120395	0.0186613	cytosolic proteasome complex	7	GO:Cellular Component
GO:0031966	AGAP007119 AGAP007309 AGAP007653 AGAP011286 AGAP009333	5	13	3.66068e-06	0.000567405	mitochondrial membrane	7	GO:Cellular Component
GO:0033179	AGAP003711 AGAP001587 AGAP000721	3	9	0.000210303	0.032597	proton-transporting V-type ATPase, V0 domain	7	GO:Cellular Component
GO:0033290	AGAP006607 AGAP011190	2	2	0	0	eukaryotic 48S preinitiation complex	7	GO:Cellular Component
GO:0043231	AGAP004786 AGAP005752 AGAP002783 AGAP003030 AGAP004484 AGAP010638 AGAP011564	7	39	8.04781e-05	0.0124741	intracellular membrane-bounded organelle	7	GO:Cellular Component
GO:0043614	AGAP002340 AGAP011190	2	2	0	0	multi-eIF complex	7	GO:Cellular Component
GO:0061617	AGAP005109 AGAP002788	2	2	0	0	MICOS complex	7	GO:Cellular Component
GO:0005681	AGAP002956 AGAP008298	2	23	0.000621713	0.0285988	spliceosomal complex	8	GO:Cellular Component
GO:0005762	AGAP002713 AGAP012030	2	22	0.000543525	0.0250021	mitochondrial large ribosomal subunit	8	GO:Cellular Component
GO:0005763	AGAP005118 AGAP009613	2	15	0.000166733	0.00766973	mitochondrial small ribosomal subunit	8	GO:Cellular Component
GO:0005832	AGAP002759 AGAP008249	2	8	2.13082e-05	0.000980178	chaperonin-containing T-complex	8	GO:Cellular Component
GO:0005747	AGAP001653 AGAP007780	2	21	0.000206031	0.00782918	mitochondrial respiratory chain complex I	9	GO:Cellular Component
GO:0005783	AGAP004098 AGAP004212 AGAP012407 AGAP010174	4	69	4.01389e-05	0.00152528	endoplasmic reticulum	9	GO:Cellular Component
GO:0005829	AGAP005432 AGAP005910 AGAP005972 AGAP009447	4	145	0.00128101	0.0486785	cytosol	9	GO:Cellular Component
GO:0005840	AGAP003592 AGAP003768 AGAP011424 AGAP009431 AGAP010163	5	122	5.96088e-05	0.00226513	ribosome	9	GO:Cellular Component
GO:0015935	AGAP003768 AGAP008329	2	11	2.66076e-05	0.00101109	small ribosomal subunit	9	GO:Cellular Component
GO:0022627	AGAP003768 AGAP011424 AGAP008329 AGAP009431	4	33	9.9105e-07	3.76599e-05	cytosolic small ribosomal subunit	9	GO:Cellular Component
GO:0005764	AGAP001960 AGAP003934	2	16	0.000597262	0.0149316	lysosome	10	GO:Cellular Component
GO:0005774	AGAP000540 AGAP010701	2	11	0.00018299	0.00457475	vacuolar membrane	10	GO:Cellular Component
GO:0016021	AGAP004784 AGAP004834 AGAP000553 AGAP005815 AGAP006490 AGAP006582 AGAP001236 AGAP002262 AGAP002638 AGAP001336 AGAP003191 AGAP003606 AGAP003873 AGAP003934 AGAP004017 AGAP004450 AGAP007069 AGAP001557 AGAP000163 AGAP000798 AGAP000107 AGAP001010 AGAP000245 AGAP000393 AGAP000466 AGAP000520 AGAP000521 AGAP000540 AGAP010311 AGAP010436 AGAP010701 AGAP010878 AGAP011296 AGAP011342 AGAP011357 AGAP011642 AGA…	48	2542	9.92919e-06	0.00024823	integral component of membrane	10	GO:Cellular Component
GO:0030054	AGAP000798 AGAP012447	2	20	0.00117852	0.0294631	cell junction	10	GO:Cellular Component
GO:0032580	AGAP003191 AGAP001010	2	6	2.30664e-05	0.000576661	Golgi cisterna membrane	10	GO:Cellular Component
GO:0045211	AGAP000798 AGAP012447	2	20	0.00117852	0.0294631	postsynaptic membrane	10	GO:Cellular Component
GO:0005737	AGAP004708 AGAP004754 AGAP005040 AGAP005042 AGAP005250 AGAP005462 AGAP005506 AGAP005523 AGAP005540 AGAP005892 AGAP005897 AGAP005933 AGAP005937 AGAP006117 AGAP006247 AGAP006573 AGAP006747 AGAP006992 AGAP006994 AGAP007097 AGAP007644 AGAP002101 AGAP002193 AGAP002251 AGAP001271 AGAP002337 AGAP002371 AGAP002608 AGAP002653 AGAP002729 AGAP002800 AGAP002935 AGAP002948 AGAP002982 AGAP003003 AGAP003014 AGA…	101	749	1.57354e-10	3.55619e-08	cytoplasm	11	GO:Cellular Component
GO:0005768	AGAP006139 AGAP007605 AGAP001211 AGAP002665 AGAP003437 AGAP004204 AGAP004487 AGAP011057	8	20	4.02295e-06	0.000909186	endosome	11	GO:Cellular Component
GO:0005794	AGAP007381 AGAP002644 AGAP003478 AGAP000671 AGAP000900 AGAP000161 AGAP011337 AGAP008251 AGAP009134 AGAP009765	10	41	0.000106571	0.024085	Golgi apparatus	11	GO:Cellular Component
GO:0005829	AGAP005080 AGAP005771 AGAP005860 AGAP006139 AGAP006226 AGAP007001 AGAP007605 AGAP007683 AGAP007722 AGAP002597 AGAP002758 AGAP002970 AGAP001369 AGAP004234 AGAP004448 AGAP004653 AGAP000719 AGAP000403 AGAP000534 AGAP010935 AGAP011156 AGAP011471 AGAP009255 AGAP009834 AGAP009985	25	145	1.23408e-05	0.00278903	cytosol	11	GO:Cellular Component
GO:0005953	AGAP011767 AGAP008406	2	2	0	0	CAAX-protein geranylgeranyltransferase complex	11	GO:Cellular Component
GO:0008180	AGAP004953 AGAP006445 AGAP008156 AGAP008598 AGAP009834	5	8	3.35703e-06	0.000758689	COP9 signalosome	11	GO:Cellular Component
GO:0012505	AGAP006100 AGAP006116 AGAP007332 AGAP001953 AGAP003389 AGAP003417 AGAP003395 AGAP003818 AGAP004144 AGAP009811	10	30	3.83505e-06	0.000866721	endomembrane system	11	GO:Cellular Component
GO:0030904	AGAP006139 AGAP007683 AGAP009255	3	4	2.6551e-05	0.00600052	retromer complex	11	GO:Cellular Component
GO:0031461	AGAP007727 AGAP002472 AGAP003605 AGAP008105	4	7	3.53146e-05	0.00798111	cullin-RING ubiquitin ligase complex	11	GO:Cellular Component
GO:0031965	AGAP005892 AGAP003576 AGAP009571 AGAP009921	4	7	3.53146e-05	0.00798111	nuclear membrane	11	GO:Cellular Component
GO:0042765	AGAP004301 AGAP010738 AGAP008074	3	5	0.000125149	0.0282837	GPI-anchor transamidase complex	11	GO:Cellular Component
GO:0000307	AGAP005056 AGAP005817 AGAP004240 AGAP008417	4	9	0.00016605	0.0360329	cyclin-dependent protein kinase holoenzyme complex	12	GO:Cellular Component
GO:0000938	AGAP005584 AGAP006623 AGAP009739	3	3	0	0	GARP complex	12	GO:Cellular Component
GO:0005634	AGAP004729 AGAP004820 AGAP005035 AGAP005056 AGAP005119 AGAP005144 AGAP005161 AGAP005270 AGAP005428 AGAP005438 AGAP005538 AGAP005541 AGAP005640 AGAP005654 AGAP005817 AGAP005857 AGAP005871 AGAP005920 AGAP005922 AGAP028012 AGAP006384 AGAP006580 AGAP006608 AGAP006770 AGAP006811 AGAP007115 AGAP007147 AGAP007388 AGAP007390 AGAP007516 AGAP001917 AGAP001938 AGAP013386 AGAP002022 AGAP002246 AGAP002322 AGA…	117	1065	2.59469e-07	5.63047e-05	nucleus	12	GO:Cellular Component
GO:0016592	AGAP005906 AGAP005909 AGAP002258 AGAP004240 AGAP011626 AGAP009141 AGAP010034	7	24	0.000150908	0.032747	mediator complex	12	GO:Cellular Component
GO:0030686	AGAP005033 AGAP005871 AGAP010491 AGAP009004	4	9	0.00016605	0.0360329	90S preribosome	12	GO:Cellular Component
GO:0031416	AGAP001878 AGAP001954	2	2	0	0	NatB complex	12	GO:Cellular Component
GO:0071011	AGAP005136 AGAP005631 AGAP001879 AGAP002780 AGAP003936 AGAP009506 AGAP009905	7	22	7.44251e-05	0.0161502	precatalytic spliceosome	12	GO:Cellular Component
GO:0071013	AGAP005136 AGAP005631 AGAP005640 AGAP001879 AGAP002512 AGAP002780 AGAP003936 AGAP009506 AGAP009905	9	32	4.2394e-05	0.00919949	catalytic step 2 spliceosome	12	GO:Cellular Component
GO:0000795	AGAP002642 AGAP012245	2	4	0.0001824	0.020976	synaptonemal complex	13	GO:Cellular Component
GO:0000811	AGAP001166 AGAP010835	2	3	4.68622e-05	0.00538915	GINS complex	13	GO:Cellular Component
GO:0005634	AGAP004956 AGAP005176 AGAP005461 AGAP005479 AGAP005480 AGAP005481 AGAP005743 AGAP005800 AGAP005804 AGAP006642 AGAP006805 AGAP007544 AGAP007703 AGAP001948 AGAP002004 AGAP002106 AGAP002255 AGAP002532 AGAP002615 AGAP002753 AGAP002836 AGAP002967 AGAP003180 AGAP004012 AGAP004082 AGAP001158 AGAP001135 AGAP004224 AGAP004594 AGAP001537 AGAP001593 AGAP001725 AGAP003920 AGAP000072 AGAP000071 AGAP001483 AGA…	67	1065	2.56519e-06	0.000294997	nucleus	13	GO:Cellular Component
GO:0005658	AGAP006065 AGAP001929	2	4	0.0001824	0.020976	alpha DNA polymerase:primase complex	13	GO:Cellular Component
GO:0005929	AGAP006172 AGAP006535 AGAP010418 AGAP011562 AGAP008872	5	17	1.89937e-05	0.00218428	cilium	13	GO:Cellular Component
GO:0030896	AGAP002255 AGAP002522	2	3	4.68622e-05	0.00538915	checkpoint clamp complex	13	GO:Cellular Component
GO:0030991	AGAP006535 AGAP010418 AGAP011562	3	5	8.1736e-06	0.000939964	intraciliary transport particle A	13	GO:Cellular Component
GO:0042555	AGAP004956 AGAP005800 AGAP001135 AGAP011536 AGAP010219	5	8	5.67838e-08	6.53013e-06	MCM complex	13	GO:Cellular Component
GO:0070652	AGAP005732 AGAP003743	2	2	0	0	HAUS complex	13	GO:Cellular Component
GO:0016021	AGAP028030 AGAP004871 AGAP004930 AGAP005002 AGAP005163 AGAP005495 AGAP005511 AGAP005527 AGAP005923 AGAP006029 AGAP006118 AGAP006167 AGAP006450 AGAP006465 AGAP006466 AGAP006666 AGAP006717 AGAP006775 AGAP006823 AGAP006903 AGAP007004 AGAP006974 AGAP007100 AGAP007266 AGAP007322 AGAP007483 AGAP007498 AGAP007564 AGAP007616 AGAP007676 AGAP007677 AGAP001812 AGAP001915 AGAP001912 AGAP001990 AGAP002043 AGA…	177	2542	3.11193e-05	0.00295633	integral component of membrane	14	GO:Cellular Component
GO:0033573	AGAP006176 AGAP006185	2	3	0.000150046	0.0142543	high-affinity iron permease complex	14	GO:Cellular Component
GO:0016021	AGAP005166 AGAP005168 AGAP005273 AGAP005435 AGAP001410 AGAP005633 AGAP005681 AGAP005914 AGAP005946 AGAP006136 AGAP006183 AGAP006216 AGAP006256 AGAP006415 AGAP006705 AGAP006898 AGAP007075 AGAP001800 AGAP001806 AGAP001817 AGAP001766 AGAP002023 AGAP002184 AGAP002279 AGAP002280 AGAP002331 AGAP002381 AGAP002376 AGAP002566 AGAP002579 AGAP002674 AGAP002739 AGAP013416 AGAP002797 AGAP002886 AGAP003204 AGA…	92	2542	9.37131e-06	0.000534165	integral component of membrane	15	GO:Cellular Component
GO:0005622	AGAP004919 AGAP005131 AGAP005947 AGAP002407 AGAP002754 AGAP002921 AGAP003475 AGAP003592 AGAP004080 AGAP028693 AGAP011896 AGAP008635 AGAP009431 AGAP009737 AGAP010163 AGAP011635	16	332	5.44684e-05	0.00408513	intracellular	MAGs Highly Variable	GO:Cellular Component
GO:0005737	AGAP005129 AGAP005649 AGAP006130 AGAP007668 AGAP007699 AGAP001804 AGAP001914 AGAP002464 AGAP002686 AGAP003475 AGAP003968 AGAP004030 AGAP004046 AGAP004071 AGAP001502 AGAP004381 AGAP001712 AGAP000627 AGAP000310 AGAP010477 AGAP010929 AGAP011423 AGAP012045 AGAP012283 AGAP007781 AGAP008049 AGAP009192 AGAP010253	28	749	2.92031e-05	0.00219023	cytoplasm	MAGs Highly Variable	GO:Cellular Component
GO:0005739	AGAP004904 AGAP013351 AGAP000843 AGAP010606 AGAP011329 AGAP011803 AGAP011829 AGAP011833 AGAP011945 AGAP007893 AGAP009737 AGAP010130	12	175	9.22844e-06	0.000692133	mitochondrion	MAGs Highly Variable	GO:Cellular Component
GO:0005759	AGAP002996 AGAP003184 AGAP001502	3	21	0.000389091	0.0291818	mitochondrial matrix	MAGs Highly Variable	GO:Cellular Component
GO:0005840	AGAP004919 AGAP005131 AGAP005947 AGAP002407 AGAP002754 AGAP002921 AGAP003592 AGAP003768 AGAP000541 AGAP028693 AGAP011424 AGAP011896 AGAP009431 AGAP010163 AGAP011635	15	122	2.45606e-10	1.84205e-08	ribosome	MAGs Highly Variable	GO:Cellular Component
GO:0022625	AGAP004919 AGAP002754 AGAP002921 AGAP011896 AGAP010163	5	45	0.000106309	0.00797317	cytosolic large ribosomal subunit	MAGs Highly Variable	GO:Cellular Component
GO:0022627	AGAP005131 AGAP005947 AGAP002407 AGAP002525 AGAP003768 AGAP000541 AGAP011424 AGAP008329 AGAP009431	9	33	1.10155e-10	8.26159e-09	cytosolic small ribosomal subunit	MAGs Highly Variable	GO:Cellular Component
GO:0030173	AGAP007491 AGAP001447	2	10	0.000533956	0.0400467	integral component of Golgi membrane	MAGs Highly Variable	GO:Cellular Component
GO:0005622	AGAP004919 AGAP005947 AGAP001952 AGAP002122 AGAP002754 AGAP003475 AGAP003592 AGAP000654 AGAP028693 AGAP011687 AGAP011896 AGAP008405 AGAP008635 AGAP009431 AGAP009737 AGAP010163	16	332	0.000589294	0.045965	intracellular	Testes Highly Variable	GO:Cellular Component
GO:0005737	AGAP004711 AGAP006130 AGAP007668 AGAP007699 AGAP001914 AGAP001952 AGAP002216 AGAP002464 AGAP002686 AGAP003090 AGAP003475 AGAP003517 AGAP004030 AGAP001165 AGAP001502 AGAP004459 AGAP000627 AGAP000883 AGAP010929 AGAP011423 AGAP011580 AGAP012045 AGAP012184 AGAP012308 AGAP008049 AGAP009459 AGAP010212 AGAP010253 AGAP010267	29	749	0.000434752	0.0339106	cytoplasm	Testes Highly Variable	GO:Cellular Component
GO:0005739	AGAP004904 AGAP007206 AGAP011329 AGAP011803 AGAP011829 AGAP011833 AGAP011945 AGAP007893 AGAP008405 AGAP009737 AGAP010130	11	175	0.000297019	0.0231675	mitochondrion	Testes Highly Variable	GO:Cellular Component
GO:0005744	AGAP013212 AGAP004657	2	5	8.60469e-05	0.00671166	mitochondrial inner membrane presequence translocase complex	Testes Highly Variable	GO:Cellular Component
GO:0005750	AGAP002245 AGAP001767	2	7	0.000291969	0.0227736	mitochondrial respiratory chain complex III	Testes Highly Variable	GO:Cellular Component
GO:0005832	AGAP003477 AGAP004238 AGAP010588	3	8	1.196e-05	0.000932883	chaperonin-containing T-complex	Testes Highly Variable	GO:Cellular Component
GO:0005840	AGAP004919 AGAP005947 AGAP002122 AGAP002754 AGAP003592 AGAP003768 AGAP000654 AGAP000655 AGAP000541 AGAP028693 AGAP011424 AGAP011687 AGAP011896 AGAP008405 AGAP009431 AGAP010163	16	122	5.64291e-10	4.40147e-08	ribosome	Testes Highly Variable	GO:Cellular Component
GO:0005852	AGAP006130 AGAP007668 AGAP011580	3	13	0.000112509	0.00877567	eukaryotic translation initiation factor 3 complex	Testes Highly Variable	GO:Cellular Component
GO:0022625	AGAP004919 AGAP002122 AGAP002754 AGAP011687 AGAP011896 AGAP010163	6	45	3.58311e-05	0.00279482	cytosolic large ribosomal subunit	Testes Highly Variable	GO:Cellular Component
GO:0022627	AGAP005947 AGAP002525 AGAP003768 AGAP000655 AGAP000541 AGAP011424 AGAP008329 AGAP009431	8	33	1.58499e-08	1.23629e-06	cytosolic small ribosomal subunit	Testes Highly Variable	GO:Cellular Component

## Sheet: GO Biological Processes
GO Biological processes
GO ID	Cluster genes in GO	Count of genes in GO	Count all genes in GO	Enrichment (p-value)	Enrichment (q-value)	GO name	Cluster ID	Annotation
GO:0000027	AGAP002395 AGAP011173 AGAP010065	3	17	2.17094e-05	0.00175846	ribosomal large subunit assembly	1	GO:Biological Process
GO:0000028	AGAP004887 AGAP010933 AGAP011777	3	15	1.26489e-05	0.00102456	ribosomal small subunit assembly	1	GO:Biological Process
GO:0002181	AGAP004919 AGAP005046 AGAP005802 AGAP006612 AGAP001910 AGAP002306 AGAP003025 AGAP003532 AGAP010591 AGAP010592 AGAP011706 AGAP011896 AGAP012100 AGAP007740	14	23	2.59229e-25	2.09975e-23	cytoplasmic translation	1	GO:Biological Process
GO:0006096	AGAP004596 AGAP011208	2	11	0.000158394	0.0128299	glycolytic process	1	GO:Biological Process
GO:0006099	AGAP004744 AGAP007852 AGAP009510	3	21	5.28993e-05	0.00428484	tricarboxylic acid cycle	1	GO:Biological Process
GO:0006122	AGAP006936 AGAP000935	2	9	8.18465e-05	0.00662957	mitochondrial electron transport, ubiquinol to cytochrome c	1	GO:Biological Process
GO:0006412	AGAP003556 AGAP004887 AGAP004919 AGAP005046 AGAP005131 AGAP005427 AGAP005802 AGAP005991 AGAP006612 AGAP006871 AGAP007580 AGAP001805 AGAP001910 AGAP002122 AGAP002306 AGAP002395 AGAP002437 AGAP003532 AGAP003538 AGAP004422 AGAP000952 AGAP011173 AGAP009508 AGAP010591 AGAP010592 AGAP010933 AGAP011077 AGAP011298 AGAP011706 AGAP011777 AGAP011802 AGAP011896 AGAP012100 AGAP012138 AGAP012284 AGAP007740 AGA…	43	143	7.66891e-55	6.21182e-53	translation	1	GO:Biological Process
GO:0006413	AGAP006459 AGAP011203 AGAP009863	3	18	2.7693e-05	0.00224313	translational initiation	1	GO:Biological Process
GO:0006414	AGAP003025 AGAP007740	2	11	0.000158394	0.0128299	translational elongation	1	GO:Biological Process
GO:0006627	AGAP006099 AGAP000935	2	7	3.46148e-05	0.0028038	protein processing involved in protein targeting to mitochondrion	1	GO:Biological Process
GO:0015986	AGAP005134 AGAP006879 AGAP003599 AGAP001138 AGAP000523 AGAP011131	6	21	9.75458e-10	7.90121e-08	ATP synthesis coupled proton transport	1	GO:Biological Process
GO:0015991	AGAP005845 AGAP002401 AGAP002884 AGAP003153 AGAP000523	5	20	3.35586e-08	2.71825e-06	ATP hydrolysis coupled proton transport	1	GO:Biological Process
GO:0046034	AGAP005134 AGAP002884 AGAP003153	3	6	1.49237e-07	1.20882e-05	ATP metabolic process	1	GO:Biological Process
GO:0099132	AGAP001138 AGAP011131	2	3	1.01896e-06	8.25359e-05	ATP hydrolysis coupled cation transmembrane transport	1	GO:Biological Process
GO:1902600	AGAP005134 AGAP001823 AGAP002884 AGAP003153 AGAP003325	5	10	1.97643e-10	1.60091e-08	hydrogen ion transmembrane transport	1	GO:Biological Process
GO:0006520	AGAP000327 AGAP009001	2	17	2.58747e-05	0.000465745	cellular amino acid metabolic process	2	GO:Biological Process
GO:0003341	AGAP007675 AGAP002009 AGAP002100 AGAP001293 AGAP011539 AGAP008661	6	18	5.70233e-09	5.8734e-07	cilium movement	3	GO:Biological Process
GO:0006749	AGAP004164 AGAP004378 AGAP009195 AGAP009196	4	27	5.44175e-05	0.00560501	glutathione metabolic process	3	GO:Biological Process
GO:0015701	AGAP001531 AGAP004633	2	6	7.28324e-05	0.00750174	bicarbonate transport	3	GO:Biological Process
GO:0019731	AGAP000694 AGAP000692	2	4	1.4909e-05	0.00153563	antibacterial humoral response	3	GO:Biological Process
GO:0030317	AGAP007334 AGAP008275 AGAP010031	3	4	5.81563e-08	5.99009e-06	flagellated sperm motility	3	GO:Biological Process
GO:0036158	AGAP007675 AGAP002100 AGAP011539	3	9	6.88904e-06	0.000709571	outer dynein arm assembly	3	GO:Biological Process
GO:0036159	AGAP002009 AGAP002100 AGAP001293	3	5	2.8721e-07	2.95827e-05	inner dynein arm assembly	3	GO:Biological Process
GO:0043171	AGAP004809 AGAP013146 AGAP013001	3	22	0.000340877	0.0351103	peptide catabolic process	3	GO:Biological Process
GO:0051453	AGAP001531 AGAP004633	2	10	0.000417188	0.0429704	regulation of intracellular pH	3	GO:Biological Process
GO:0055085	AGAP005319 AGAP006380 AGAP001777 AGAP001775 AGAP001202 AGAP002587 AGAP002595 AGAP004457 AGAP001531 AGAP004633 AGAP010383 AGAP010854 AGAP010973 AGAP028006 AGAP008359	15	319	4.22607e-05	0.00435285	transmembrane transport	3	GO:Biological Process
GO:0060271	AGAP007334 AGAP008275 AGAP008661 AGAP009594 AGAP010031	5	38	2.47824e-05	0.00255259	cilium assembly	3	GO:Biological Process
GO:0060285	AGAP006735 AGAP001293	2	2	0	0	cilium-dependent cell motility	3	GO:Biological Process
GO:0060294	AGAP007334 AGAP008275 AGAP010031	3	5	2.8721e-07	2.95827e-05	cilium movement involved in cell motility	3	GO:Biological Process
GO:0000469	AGAP002333 AGAP004064	2	4	4.61912e-05	0.0121021	cleavage involved in rRNA processing	4	GO:Biological Process
GO:0006004	AGAP000757 AGAP011338	2	3	1.17468e-05	0.00307767	fucose metabolic process	4	GO:Biological Process
GO:0006260	AGAP005321 AGAP005917 AGAP007063 AGAP004408 AGAP000978 AGAP011448 AGAP010177	7	50	1.56e-05	0.0040872	DNA replication	4	GO:Biological Process
GO:0006270	AGAP007063 AGAP004408 AGAP000978 AGAP011961	4	20	6.98659e-05	0.0183049	DNA replication initiation	4	GO:Biological Process
GO:0006275	AGAP000496 AGAP010220	2	3	1.17468e-05	0.00307767	regulation of DNA replication	4	GO:Biological Process
GO:0006782	AGAP003184 AGAP011895	2	3	1.17468e-05	0.00307767	protoporphyrinogen IX biosynthetic process	4	GO:Biological Process
GO:0006995	AGAP003858 AGAP000438	2	4	4.61912e-05	0.0121021	cellular response to nitrogen starvation	4	GO:Biological Process
GO:0017183	AGAP004412 AGAP000934	2	3	1.17468e-05	0.00307767	peptidyl-diphthamide biosynthetic process from peptidyl-histidine	4	GO:Biological Process
GO:0031145	AGAP002345 AGAP011799	2	3	1.17468e-05	0.00307767	anaphase-promoting complex-dependent catabolic process	4	GO:Biological Process
GO:0043328	AGAP004755 AGAP011497	2	4	4.61912e-05	0.0121021	protein transport to vacuole involved in ubiquitin-dependent protein catabolic process via the multivesicular body sorting pathway	4	GO:Biological Process
GO:0000470	AGAP005221 AGAP007254 AGAP012204	3	14	0.000127758	0.0272125	maturation of LSU-rRNA	5	GO:Biological Process
GO:0006366	AGAP005814 AGAP007810 AGAP010064	3	23	5.77208e-05	0.00455995	transcription from RNA polymerase II promoter	6	GO:Biological Process
GO:0006412	AGAP004818 AGAP002407 AGAP002754 AGAP002921 AGAP003217 AGAP003770 AGAP000541 AGAP011946 AGAP008405 AGAP008773	10	143	1.00895e-07	7.97074e-06	translation	6	GO:Biological Process
GO:0006614	AGAP002183 AGAP008339	2	9	6.56362e-05	0.00518526	SRP-dependent cotranslational protein targeting to membrane	6	GO:Biological Process
GO:0016226	AGAP005422 AGAP000598 AGAP000444	3	12	3.49649e-06	0.000276223	iron-sulfur cluster assembly	6	GO:Biological Process
GO:0032543	AGAP004818 AGAP002407	2	18	0.00059926	0.0473415	mitochondrial translation	6	GO:Biological Process
GO:0045047	AGAP002183 AGAP011842	2	3	8.14477e-07	6.43437e-05	protein targeting to ER	6	GO:Biological Process
GO:0061077	AGAP003134 AGAP003477	2	15	0.000341118	0.0269483	chaperone-mediated protein folding	6	GO:Biological Process
GO:0000054	AGAP002182 AGAP001380	2	3	5.21295e-05	0.0179847	ribosomal subunit export from nucleus	7	GO:Biological Process
GO:0000060	AGAP006942 AGAP001958 AGAP003769	3	6	2.73984e-05	0.00945245	protein import into nucleus, translocation	7	GO:Biological Process
GO:0001732	AGAP006607 AGAP002340	2	2	0	0	formation of cytoplasmic translation initiation complex	7	GO:Biological Process
GO:0005978	AGAP001200 AGAP002586 AGAP010428	3	5	9.41217e-06	0.0032472	glycogen biosynthetic process	7	GO:Biological Process
GO:0006086	AGAP004786 AGAP003030	2	3	5.21295e-05	0.0179847	acetyl-CoA biosynthetic process from pyruvate	7	GO:Biological Process
GO:0006096	AGAP002564 AGAP001420 AGAP007642 AGAP012167 AGAP008802	5	11	1.05096e-06	0.000362582	glycolytic process	7	GO:Biological Process
GO:0006099	AGAP007309 AGAP001884 AGAP001312 AGAP003168 AGAP004055 AGAP000618 AGAP010429 AGAP012048 AGAP012191 AGAP007786	10	21	4.5624e-11	1.57403e-08	tricarboxylic acid cycle	7	GO:Biological Process
GO:0006101	AGAP012048 AGAP010156	2	2	0	0	citrate metabolic process	7	GO:Biological Process
GO:0006120	AGAP006918 AGAP002170 AGAP002889 AGAP011130 AGAP009072 AGAP009865 AGAP012705	7	10	1.53776e-10	5.30529e-08	mitochondrial electron transport, NADH to ubiquinone	7	GO:Biological Process
GO:0006121	AGAP000618 AGAP010429 AGAP012191	3	4	1.94009e-06	0.00066933	mitochondrial electron transport, succinate to ubiquinone	7	GO:Biological Process
GO:0006415	AGAP002182 AGAP010310 AGAP009310	3	7	6.20344e-05	0.0214019	translational termination	7	GO:Biological Process
GO:0006446	AGAP011580 AGAP012140	2	2	0	0	regulation of translational initiation	7	GO:Biological Process
GO:0006511	AGAP004960 AGAP007106 AGAP007418 AGAP001973 AGAP001995 AGAP001209 AGAP002169 AGAP003615 AGAP001651 AGAP011535 AGAP008007 AGAP008816	12	65	6.70628e-07	0.000231367	ubiquitin-dependent protein catabolic process	7	GO:Biological Process
GO:0006607	AGAP005401 AGAP006942 AGAP001273 AGAP003769	4	8	3.67348e-06	0.00126735	NLS-bearing protein import into nucleus	7	GO:Biological Process
GO:0006633	AGAP004373 AGAP001713 AGAP010464 AGAP010156	4	14	0.000108885	0.0375652	fatty acid biosynthetic process	7	GO:Biological Process
GO:0007035	AGAP003711 AGAP001587 AGAP000721	3	5	9.41217e-06	0.0032472	vacuolar acidification	7	GO:Biological Process
GO:0008152	AGAP004786 AGAP004977 AGAP005749 AGAP005752 AGAP006096 AGAP006360 AGAP006821 AGAP007113 AGAP007619 AGAP001899 AGAP002499 AGAP002518 AGAP002718 AGAP002783 AGAP001312 AGAP003030 AGAP003687 AGAP001420 AGAP004055 AGAP004366 AGAP002482 AGAP010421 AGAP011564 AGAP011827 AGAP007921 AGAP007941 AGAP007975 AGAP008749 AGAP009945 AGAP010156	30	226	3.61335e-10	1.2466e-07	metabolic process	7	GO:Biological Process
GO:0022904	AGAP005621 AGAP005894 AGAP007309	3	7	6.20344e-05	0.0214019	respiratory electron transport chain	7	GO:Biological Process
GO:0045899	AGAP003008 AGAP001407 AGAP011174	3	8	0.000120395	0.0415364	positive regulation of RNA polymerase II transcriptional preinitiation complex assembly	7	GO:Biological Process
GO:0051603	AGAP004960 AGAP001973 AGAP001995 AGAP002879 AGAP010718 AGAP011444 AGAP008816 AGAP008837 AGAP009271	9	24	6.04585e-09	2.08582e-06	proteolysis involved in cellular protein catabolic process	7	GO:Biological Process
GO:0055114	AGAP005234 AGAP005520 AGAP005618 AGAP005662 AGAP006360 AGAP006456 AGAP007309 AGAP007593 AGAP001899 AGAP002170 AGAP002418 AGAP002419 AGAP002499 AGAP002518 AGAP002652 AGAP002769 AGAP003167 AGAP003168 AGAP003584 AGAP003608 AGAP004159 AGAP004197 AGAP004366 AGAP001507 AGAP001713 AGAP000818 AGAP000092 AGAP000877 AGAP010429 AGAP011050 AGAP011051 AGAP011053 AGAP011798 AGAP011824 AGAP012292 AGAP010517 AGA…	43	462	1.16297e-08	4.01223e-06	oxidation-reduction process	7	GO:Biological Process
GO:0006457	AGAP002759 AGAP000044 AGAP008249 AGAP010212	4	61	8.52331e-05	0.00767098	protein folding	8	GO:Biological Process
GO:0006458	AGAP002759 AGAP008249	2	9	3.17907e-05	0.00286117	primede novoprime protein folding	8	GO:Biological Process
GO:0061077	AGAP002759 AGAP008249	2	15	0.000166733	0.015006	chaperone-mediated protein folding	8	GO:Biological Process
GO:0006412	AGAP003768 AGAP011424 AGAP008329 AGAP009431 AGAP010163	5	143	0.000143592	0.00990782	translation	9	GO:Biological Process
GO:0006457	AGAP002996 AGAP004212 AGAP004238 AGAP010691 AGAP012407	5	61	1.07122e-06	7.39141e-05	protein folding	9	GO:Biological Process
GO:0006635	AGAP011833 AGAP007784 AGAP010130	3	10	1.82679e-07	1.26048e-05	fatty acid beta-oxidation	9	GO:Biological Process
GO:0030163	AGAP002996 AGAP003277	2	12	3.53345e-05	0.00243808	protein catabolic process	9	GO:Biological Process
GO:0003333	AGAP000540 AGAP010701	2	12	0.000242086	0.0203352	amino acid transmembrane transport	10	GO:Biological Process
GO:0006171	AGAP002262 AGAP010436	2	5	1.1624e-05	0.000976419	cAMP biosynthetic process	10	GO:Biological Process
GO:0006729	AGAP006441 AGAP008730	2	4	4.68624e-06	0.000393644	tetrahydrobiopterin biosynthetic process	10	GO:Biological Process
GO:0006811	AGAP007086 AGAP001557 AGAP000798 AGAP000107 AGAP008435 AGAP012447	6	97	7.73471e-05	0.00649715	ion transport	10	GO:Biological Process
GO:0010025	AGAP004784 AGAP003606	2	15	0.000489078	0.0410826	wax biosynthetic process	10	GO:Biological Process
GO:0018149	AGAP009100 AGAP009098	2	3	1.18079e-06	9.91867e-05	peptide cross-linking	10	GO:Biological Process
GO:0030198	AGAP002157 AGAP010238	2	2	0	0	extracellular matrix organization	10	GO:Biological Process
GO:0035336	AGAP004784 AGAP003606	2	15	0.000489078	0.0410826	long-chain fatty-acyl-CoA metabolic process	10	GO:Biological Process
GO:0000338	AGAP004953 AGAP006445 AGAP008156 AGAP008598 AGAP009834	5	7	8.93958e-07	0.000460388	protein deneddylation	11	GO:Biological Process
GO:0006511	AGAP005540 AGAP006445 AGAP007600 AGAP007727 AGAP002251 AGAP002982 AGAP003605 AGAP003643 AGAP004520 AGAP001068 AGAP012113 AGAP012139 AGAP012248 AGAP007870 AGAP008105 AGAP009074 AGAP008805	17	65	4.4135e-07	0.000227295	ubiquitin-dependent protein catabolic process	11	GO:Biological Process
GO:0006661	AGAP003478 AGAP000770	2	2	0	0	phosphatidylinositol biosynthetic process	11	GO:Biological Process
GO:0006886	AGAP005376 AGAP005632 AGAP005892 AGAP006100 AGAP006116 AGAP006139 AGAP007332 AGAP007522 AGAP007683 AGAP001953 AGAP001271 AGAP002498 AGAP001110 AGAP002665 AGAP002970 AGAP003359 AGAP003417 AGAP003576 AGAP003818 AGAP004439 AGAP000161 AGAP011057 AGAP011156 AGAP011374 AGAP011904 AGAP008251 AGAP008494 AGAP008756 AGAP009255 AGAP009571 AGAP009840 AGAP009921	32	100	3.04901e-14	1.57024e-11	intracellular protein transport	11	GO:Biological Process
GO:0006897	AGAP003437 AGAP001148 AGAP004487 AGAP000700 AGAP000322 AGAP009255	6	16	6.23957e-05	0.0321338	endocytosis	11	GO:Biological Process
GO:0006898	AGAP005771 AGAP003715 AGAP001058	3	3	0	0	receptor-mediated endocytosis	11	GO:Biological Process
GO:0007030	AGAP007381 AGAP002644 AGAP003824 AGAP004439 AGAP009765	5	12	8.61308e-05	0.0443573	Golgi organization	11	GO:Biological Process
GO:0016050	AGAP003437 AGAP004487 AGAP009255	3	3	0	0	vesicle organization	11	GO:Biological Process
GO:0016192	AGAP005042 AGAP007522 AGAP002357 AGAP002498 AGAP002665 AGAP003359 AGAP001527 AGAP000700 AGAP000995 AGAP000161 AGAP011374 AGAP008251 AGAP008756 AGAP008974	14	62	2.39976e-05	0.0123588	vesicle-mediated transport	11	GO:Biological Process
GO:0016579	AGAP005540 AGAP007001 AGAP007600 AGAP002086 AGAP003643 AGAP012113 AGAP012139 AGAP012248 AGAP008805	9	30	2.80243e-05	0.0144325	protein deubiquitination	11	GO:Biological Process
GO:0018344	AGAP013277 AGAP011767 AGAP008406 AGAP009724	4	5	1.90144e-06	0.000979243	protein geranylgeranylation	11	GO:Biological Process
GO:0030968	AGAP007001 AGAP013357 AGAP003179 AGAP003560 AGAP001464	5	8	3.35703e-06	0.00172887	endoplasmic reticulum unfolded protein response	11	GO:Biological Process
GO:0034402	AGAP001228 AGAP008885	2	2	0	0	recruitment of 3prime-end processing factors to RNA polymerase II holoenzyme complex	11	GO:Biological Process
GO:0043547	AGAP007010 AGAP007332 AGAP002729 AGAP002982 AGAP004143 AGAP004520	6	15	3.74162e-05	0.0192693	positive regulation of GTPase activity	11	GO:Biological Process
GO:0044237	AGAP005937 AGAP007097 AGAP001228 AGAP002300 AGAP003650	5	10	2.21965e-05	0.0114312	cellular metabolic process	11	GO:Biological Process
GO:0046604	AGAP002982 AGAP004520	2	2	0	0	positive regulation of mitotic centrosome separation	11	GO:Biological Process
GO:0048869	AGAP005178 AGAP005759	2	2	0	0	cellular developmental process	11	GO:Biological Process
GO:1990592	AGAP001364 AGAP008099	2	2	0	0	protein K69-linked ufmylation	11	GO:Biological Process
GO:0000012	AGAP002605 AGAP010577	2	2	0	0	single strand break repair	12	GO:Biological Process
GO:0000724	AGAP005290 AGAP007402 AGAP001255 AGAP002805 AGAP002985 AGAP003213 AGAP003676 AGAP011623	8	16	2.86728e-07	0.000146231	double-strand break repair via homologous recombination	12	GO:Biological Process
GO:0006396	AGAP004820 AGAP005640 AGAP006138 AGAP006599 AGAP001879 AGAP002077 AGAP002223 AGAP002348 AGAP002600 AGAP002687 AGAP002829 AGAP002959 AGAP003019 AGAP001338 AGAP003595 AGAP012289 AGAP012408 AGAP009185	18	50	3.70187e-10	1.88795e-07	RNA processing	12	GO:Biological Process
GO:0007224	AGAP004140 AGAP008625	2	2	0	0	smoothened signaling pathway	12	GO:Biological Process
GO:0016233	AGAP003213 AGAP003676	2	2	0	0	telomere capping	12	GO:Biological Process
GO:0016236	AGAP000602 AGAP000469	2	2	0	0	macroautophagy	12	GO:Biological Process
GO:0016567	AGAP005048 AGAP005654 AGAP005955 AGAP006580 AGAP001882 AGAP002404 AGAP003004 AGAP003645 AGAP004062 AGAP001513 AGAP011142 AGAP011932 AGAP012101	13	49	4.16933e-06	0.00212636	protein ubiquitination	12	GO:Biological Process
GO:0030204	AGAP002801 AGAP001367	2	2	0	0	chondroitin sulfate metabolic process	12	GO:Biological Process
GO:0030261	AGAP002822 AGAP003434	2	2	0	0	chromosome condensation	12	GO:Biological Process
GO:0045944	AGAP005056 AGAP005731 AGAP006384 AGAP003094 AGAP003882 AGAP004240 AGAP004361 AGAP008417 AGAP008832	9	33	5.70355e-05	0.0290881	positive regulation of transcription from RNA polymerase II promoter	12	GO:Biological Process
GO:0048193	AGAP005584 AGAP006251 AGAP007482 AGAP012083	4	8	7.83286e-05	0.0399476	Golgi vesicle transport	12	GO:Biological Process
GO:0050650	AGAP002801 AGAP001367	2	2	0	0	chondroitin sulfate proteoglycan biosynthetic process	12	GO:Biological Process
GO:0051292	AGAP002692 AGAP003459	2	2	0	0	nuclear pore complex assembly	12	GO:Biological Process
GO:0006260	AGAP004956 AGAP005800 AGAP001929 AGAP002580 AGAP002967 AGAP001135 AGAP010720 AGAP010835 AGAP011246 AGAP007775 AGAP009047 AGAP010219 AGAP012743 AGAP028415	14	50	1.32578e-10	3.53984e-08	DNA replication	13	GO:Biological Process
GO:0006261	AGAP001166 AGAP011536 AGAP009047	3	8	0.000104888	0.0280051	DNA-dependent DNA replication	13	GO:Biological Process
GO:0006270	AGAP004956 AGAP005176 AGAP005800 AGAP002580 AGAP001166 AGAP001135 AGAP011246 AGAP010219	8	20	1.14808e-08	3.06537e-06	DNA replication initiation	13	GO:Biological Process
GO:0006281	AGAP005052 AGAP005461 AGAP001854 AGAP002255 AGAP002259 AGAP002522 AGAP002669 AGAP002967 AGAP013180 AGAP004082 AGAP001158 AGAP011769 AGAP007775 AGAP008426 AGAP009047 AGAP009655	16	82	4.27348e-09	1.14102e-06	DNA repair	13	GO:Biological Process
GO:0006298	AGAP007126 AGAP002106 AGAP002642 AGAP012245	4	11	2.32506e-05	0.00620791	mismatch repair	13	GO:Biological Process
GO:0006310	AGAP002259 AGAP002967 AGAP007775 AGAP028528	4	14	9.20573e-05	0.0245793	DNA recombination	13	GO:Biological Process
GO:0007062	AGAP011536 AGAP011742	2	4	0.0001824	0.0487007	sister chromatid cohesion	13	GO:Biological Process
GO:0035721	AGAP006535 AGAP010418 AGAP011562	3	5	8.1736e-06	0.00218235	intraciliary retrograde transport	13	GO:Biological Process
GO:0051026	AGAP002642 AGAP012245	2	2	0	0	chiasma assembly	13	GO:Biological Process
GO:0051225	AGAP005732 AGAP003743	2	2	0	0	spindle assembly	13	GO:Biological Process
GO:0060271	AGAP006166 AGAP006172 AGAP006535 AGAP001301 AGAP010418 AGAP011562 AGAP008872	7	38	5.14873e-05	0.0137471	cilium assembly	13	GO:Biological Process
GO:0061512	AGAP006172 AGAP006535 AGAP011562	3	6	2.38185e-05	0.00635954	protein localization to cilium	13	GO:Biological Process
GO:0090305	AGAP002522 AGAP011538	2	4	0.0001824	0.0487007	nucleic acid phosphodiester bond hydrolysis	13	GO:Biological Process
GO:0006434	AGAP013209 AGAP000991	2	3	0.000150046	0.0388618	seryl-tRNA aminoacylation	14	GO:Biological Process
GO:0007186	AGAP004930 AGAP005002 AGAP002519 AGAP004034 AGAP004123 AGAP004222 AGAP000115 AGAP000369 AGAP000445 AGAP009514 AGAP011646 AGAP012164 AGAP012225 AGAP012378 AGAP008302 AGAP010089 AGAP012578 AGAP007136	18	128	4.53307e-05	0.0117406	G-protein coupled receptor signaling pathway	14	GO:Biological Process
GO:0009311	AGAP005846 AGAP006903	2	3	0.000150046	0.0388618	oligosaccharide metabolic process	14	GO:Biological Process
GO:0019918	AGAP006938 AGAP009048	2	2	0	0	peptidyl-arginine methylation, to symmetrical-dimethyl arginine	14	GO:Biological Process
GO:0033215	AGAP006176 AGAP006185	2	3	0.000150046	0.0388618	iron assimilation by reduction and transport	14	GO:Biological Process
GO:0034755	AGAP006176 AGAP006185	2	3	0.000150046	0.0388618	iron ion transmembrane transport	14	GO:Biological Process
GO:0006388	AGAP007591 AGAP009485	2	6	0.000260727	0.0466701	tRNA splicing, via endonucleolytic cleavage and ligation	15	GO:Biological Process
GO:0006493	AGAP002674 AGAP004267 AGAP010784	3	4	3.27783e-07	5.86732e-05	protein O-linked glycosylation	15	GO:Biological Process
GO:0009113	AGAP002830 AGAP000179	2	3	1.37599e-05	0.00246303	purine nucleobase biosynthetic process	15	GO:Biological Process
GO:0071712	AGAP002674 AGAP010784	2	5	0.000132729	0.0237585	ER-associated misfolded protein catabolic process	15	GO:Biological Process
GO:0002181	AGAP004919 AGAP002754 AGAP002921 AGAP011896	4	23	3.57677e-05	0.00661702	cytoplasmic translation	MAGs Highly Variable	GO:Biological Process
GO:0006412	AGAP004919 AGAP005131 AGAP005947 AGAP002407 AGAP002754 AGAP002921 AGAP003768 AGAP000541 AGAP028693 AGAP011424 AGAP011896 AGAP011946 AGAP008329 AGAP009431 AGAP010163 AGAP011635	16	143	3.20341e-10	5.92631e-08	translation	MAGs Highly Variable	GO:Biological Process
GO:0006457	AGAP005081 AGAP007393 AGAP001914 AGAP002996 AGAP001424 AGAP004238 AGAP001502 AGAP000044 AGAP012407	9	61	7.07239e-08	1.30839e-05	protein folding	MAGs Highly Variable	GO:Biological Process
GO:0006635	AGAP011329 AGAP011833 AGAP010130	3	10	1.58197e-05	0.00292664	fatty acid beta-oxidation	MAGs Highly Variable	GO:Biological Process
GO:0033617	AGAP013351 AGAP007893	2	7	0.00016175	0.0299238	mitochondrial respiratory chain complex IV assembly	MAGs Highly Variable	GO:Biological Process
GO:0034976	AGAP007393 AGAP000044 AGAP012407	3	8	5.41691e-06	0.00100213	response to endoplasmic reticulum stress	MAGs Highly Variable	GO:Biological Process
GO:0051017	AGAP005649 AGAP004071	2	4	1.92012e-05	0.00355223	actin filament bundle assembly	MAGs Highly Variable	GO:Biological Process
GO:0006412	AGAP004919 AGAP005947 AGAP002122 AGAP002754 AGAP003768 AGAP000654 AGAP000655 AGAP000541 AGAP028693 AGAP011424 AGAP011687 AGAP011896 AGAP008329 AGAP008405 AGAP009431 AGAP010163 AGAP010267	17	143	9.47237e-10	1.69555e-07	translation	Testes Highly Variable	GO:Biological Process
GO:0006414	AGAP000883 AGAP009737 AGAP004235	3	11	5.36638e-05	0.00960582	translational elongation	Testes Highly Variable	GO:Biological Process
GO:0006457	AGAP005081 AGAP007393 AGAP001914 AGAP002996 AGAP003477 AGAP001424 AGAP004238 AGAP001502 AGAP000044 AGAP010588 AGAP012407 AGAP010212	12	61	2.75868e-10	4.93803e-08	protein folding	Testes Highly Variable	GO:Biological Process
GO:0006458	AGAP003477 AGAP004238 AGAP010588	3	9	2.1176e-05	0.00379051	primede novoprime protein folding	Testes Highly Variable	GO:Biological Process
GO:0006635	AGAP011329 AGAP011833 AGAP010130	3	10	3.47166e-05	0.00621428	fatty acid beta-oxidation	Testes Highly Variable	GO:Biological Process
GO:0006782	AGAP003184 AGAP011895	2	3	8.87623e-06	0.00158885	protoporphyrinogen IX biosynthetic process	Testes Highly Variable	GO:Biological Process
GO:0009060	AGAP002245 AGAP001767 AGAP000851 AGAP007893	4	11	1.55912e-06	0.000279082	aerobic respiration	Testes Highly Variable	GO:Biological Process
GO:0019538	AGAP001952 AGAP003475	2	5	8.60469e-05	0.0154024	protein metabolic process	Testes Highly Variable	GO:Biological Process
GO:0019731	AGAP000694 AGAP000692	2	4	3.49574e-05	0.00625737	antibacterial humoral response	Testes Highly Variable	GO:Biological Process
GO:0030150	AGAP013212 AGAP004657 AGAP008539	3	15	0.000207847	0.0372046	protein import into mitochondrial matrix	Testes Highly Variable	GO:Biological Process
GO:0034976	AGAP007393 AGAP000044 AGAP012407	3	8	1.196e-05	0.00214085	response to endoplasmic reticulum stress	Testes Highly Variable	GO:Biological Process
GO:0061077	AGAP003477 AGAP004238 AGAP010588 AGAP012184	4	15	9.46399e-06	0.00169405	chaperone-mediated protein folding	Testes Highly Variable	GO:Biological Process

## Sheet: KEGG Pathways
Pathway name	Pathway ID	Genes in Pathway	Count of genes in Pathway	Count of all genes in Pathway	Enrichment (p-value)	Enrichment (q-value)	Cluster ID	Annotation
2-Oxocarboxylic acid metabolism	aga01210	AgaP_AGAP000679 AgaP_AGAP000901 AgaP_AGAP007852	3	13	0.00116195	0.0168483	1	KEGG:Pathway
Citrate cycle (TCA cycle)	aga00020	AgaP_AGAP004744 AgaP_AGAP007852 AgaP_AGAP009510 AgaP_AGAP011629	4	29	0.00448374	0.0433429	1	KEGG:Pathway
Oxidative phosphorylation	aga00190	AgaP_AGAP000109 AgaP_AGAP000523 AgaP_AGAP001138 AgaP_AGAP001823 AgaP_AGAP002401 AgaP_AGAP002884 AgaP_AGAP003153 AgaP_AGAP003325 AgaP_AGAP003599 AgaP_AGAP005134 AgaP_AGAP005845 AgaP_AGAP006099 AgaP_AGAP006879 AgaP_AGAP006936 AgaP_AGAP007768 AgaP_AGAP008955 AgaP_AGAP009652 AgaP_AGAP010039 AgaP_AGAP010298 AgaP_AGAP011131	20	113	5.48751e-10	1.59138e-08	1	KEGG:Pathway
Phagosome	aga04145	AgaP_AGAP001823 AgaP_AGAP002401 AgaP_AGAP002884 AgaP_AGAP003153 AgaP_AGAP005095 AgaP_AGAP005845 AgaP_AGAP010298 AgaP_AGAP011828	8	61	0.00044601	0.00862287	1	KEGG:Pathway
Pyruvate metabolism	aga00620	AgaP_AGAP004596 AgaP_AGAP009510 AgaP_AGAP009944 AgaP_AGAP011629	4	29	0.00448374	0.0433429	1	KEGG:Pathway
Ribosome	aga03010	AgaP_AGAP000952 AgaP_AGAP001805 AgaP_AGAP001910 AgaP_AGAP002122 AgaP_AGAP002306 AgaP_AGAP002395 AgaP_AGAP002437 AgaP_AGAP003025 AgaP_AGAP003532 AgaP_AGAP003538 AgaP_AGAP003556 AgaP_AGAP004422 AgaP_AGAP004462 AgaP_AGAP004887 AgaP_AGAP004919 AgaP_AGAP005046 AgaP_AGAP005131 AgaP_AGAP005427 AgaP_AGAP005802 AgaP_AGAP005991 AgaP_AGAP006612 AgaP_AGAP006871 AgaP_AGAP007580 AgaP_AGAP007740 AgaP_AGAP008916…	47	133	2.02624e-38	1.17522e-36	1	KEGG:Pathway
Starch and sucrose metabolism	aga00500	AgaP_AGAP007939 AgaP_AGAP008227 AgaP_AGAP011208	3	19	0.00526409	0.0436167	1	KEGG:Pathway
Insect hormone biosynthesis	aga00981	AgaP_AGAP000284 AgaP_AGAP001039 AgaP_AGAP002429	3	20	8.74032e-07	1.92287e-05	2	KEGG:Pathway
Protein processing in endoplasmic reticulum	aga04141	AgaP_AGAP000747 AgaP_AGAP007162	2	110	0.00997092	0.0156686	2	KEGG:Pathway
Amino sugar and nucleotide sugar metabolism	aga00520	AgaP_AGAP001205 AgaP_AGAP006414 AgaP_AGAP007700	3	43	0.00157829	0.00545227	3	KEGG:Pathway
Arginine and proline metabolism	aga00330	AgaP_AGAP000881 AgaP_AGAP003578	2	33	0.00691473	0.0145978	3	KEGG:Pathway
Ascorbate and aldarate metabolism	aga00053	AgaP_AGAP000881 AgaP_AGAP003578	2	9	0.000129713	0.000821515	3	KEGG:Pathway
beta-Alanine metabolism	aga00410	AgaP_AGAP000881 AgaP_AGAP003578	2	18	0.00116991	0.00444566	3	KEGG:Pathway
Drug metabolism - cytochrome P450	aga00982	AgaP_AGAP004164 AgaP_AGAP004378 AgaP_AGAP009195 AgaP_AGAP009196 AgaP_AGAP009946	5	24	2.22596e-07	3.67863e-06	3	KEGG:Pathway
Drug metabolism - other enzymes	aga00983	AgaP_AGAP003227 AgaP_AGAP004164 AgaP_AGAP004378 AgaP_AGAP009195 AgaP_AGAP009196 AgaP_AGAP009946	6	43	4.51581e-07	4.29002e-06	3	KEGG:Pathway
Fatty acid degradation	aga00071	AgaP_AGAP000881 AgaP_AGAP003578	2	28	0.00432587	0.0126449	3	KEGG:Pathway
Galactose metabolism	aga00052	AgaP_AGAP004376 AgaP_AGAP012400	2	22	0.00213638	0.0067652	3	KEGG:Pathway
Glutathione metabolism	aga00480	AgaP_AGAP004164 AgaP_AGAP004378 AgaP_AGAP004809 AgaP_AGAP009195 AgaP_AGAP009196 AgaP_AGAP009946 AgaP_AGAP013001	7	54	1.27665e-07	3.67863e-06	3	KEGG:Pathway
Glycerolipid metabolism	aga00561	AgaP_AGAP000881 AgaP_AGAP003578	2	31	0.00579107	0.0137538	3	KEGG:Pathway
Glycine, serine and threonine metabolism	aga00260	AgaP_AGAP000881 AgaP_AGAP003688	2	30	0.00527377	0.0133602	3	KEGG:Pathway
Glycolysis / Gluconeogenesis	aga00010	AgaP_AGAP000881 AgaP_AGAP003578 AgaP_AGAP004376	3	32	0.000504949	0.00239851	3	KEGG:Pathway
Histidine metabolism	aga00340	AgaP_AGAP000881 AgaP_AGAP003578	2	8	8.71925e-05	0.000662663	3	KEGG:Pathway
Lysine degradation	aga00310	AgaP_AGAP000881 AgaP_AGAP003578 AgaP_AGAP008632	3	31	0.000445602	0.00239851	3	KEGG:Pathway
Metabolic pathways	aga01100	AgaP_AGAP000415 AgaP_AGAP000881 AgaP_AGAP003227 AgaP_AGAP003578 AgaP_AGAP003688 AgaP_AGAP004376 AgaP_AGAP004809 AgaP_AGAP006414 AgaP_AGAP006824 AgaP_AGAP008502 AgaP_AGAP008632 AgaP_AGAP010596 AgaP_AGAP012400 AgaP_AGAP013001	14	783	0.0282821	0.0430879	3	KEGG:Pathway
Metabolism of xenobiotics by cytochrome P450	aga00980	AgaP_AGAP004164 AgaP_AGAP004378 AgaP_AGAP009195 AgaP_AGAP009196 AgaP_AGAP009946	5	25	2.90418e-07	3.67863e-06	3	KEGG:Pathway
Pyruvate metabolism	aga00620	AgaP_AGAP000881 AgaP_AGAP003578	2	29	0.00478553	0.0129893	3	KEGG:Pathway
Tryptophan metabolism	aga00380	AgaP_AGAP000881 AgaP_AGAP003578	2	18	0.00116991	0.00444566	3	KEGG:Pathway
Valine, leucine and isoleucine degradation	aga00280	AgaP_AGAP000881 AgaP_AGAP003578	2	32	0.00633791	0.0141671	3	KEGG:Pathway
Base excision repair	aga03410	AgaP_AGAP004965 AgaP_AGAP010220 AgaP_AGAP011448	3	17	0.00222453	0.0389294	4	KEGG:Pathway
DNA replication	aga03030	AgaP_AGAP004408 AgaP_AGAP004965 AgaP_AGAP007741 AgaP_AGAP010177 AgaP_AGAP010220 AgaP_AGAP011448	6	34	0.000114705	0.00802933	4	KEGG:Pathway
Mismatch repair	aga03430	AgaP_AGAP010177 AgaP_AGAP010220 AgaP_AGAP012192	3	18	0.00278555	0.0389977	4	KEGG:Pathway
Non-homologous end-joining	aga03450	AgaP_AGAP000623 AgaP_AGAP011448	2	8	0.00195536	0.0389294	4	KEGG:Pathway
Nucleotide excision repair	aga03420	AgaP_AGAP004965 AgaP_AGAP010177 AgaP_AGAP010220 AgaP_AGAP010559 AgaP_AGAP010984	5	39	0.00184477	0.0389294	4	KEGG:Pathway
SNARE interactions in vesicular transport	aga04130	AgaP_AGAP000392 AgaP_AGAP003800 AgaP_AGAP005684	3	20	0.0041838	0.041838	4	KEGG:Pathway
Spliceosome	aga03040	AgaP_AGAP002301 AgaP_AGAP002305 AgaP_AGAP002307 AgaP_AGAP004070 AgaP_AGAP006245 AgaP_AGAP007246 AgaP_AGAP008122 AgaP_AGAP008549 AgaP_AGAP013051	9	108	0.00339874	0.039652	4	KEGG:Pathway
Toll and Imd signaling pathway	aga04624	AgaP_AGAP000310 AgaP_AGAP003062 AgaP_AGAP006386 AgaP_AGAP008416	4	33	0.0048051	0.0420446	4	KEGG:Pathway
Drug metabolism - cytochrome P450	aga00982	AgaP_AGAP007374 AgaP_AGAP009192	2	24	0.0101311	0.0337847	6	KEGG:Pathway
Metabolism of xenobiotics by cytochrome P450	aga00980	AgaP_AGAP007374 AgaP_AGAP009192	2	25	0.0113589	0.0337847	6	KEGG:Pathway
Oxidative phosphorylation	aga00190	AgaP_AGAP000851 AgaP_AGAP001711 AgaP_AGAP004400 AgaP_AGAP007966 AgaP_AGAP009491 AgaP_AGAP011829	6	113	0.00507127	0.0332037	6	KEGG:Pathway
Porphyrin and chlorophyll metabolism	aga00860	AgaP_AGAP007374 AgaP_AGAP011080	2	19	0.00518808	0.0332037	6	KEGG:Pathway
Protein export	aga03060	AgaP_AGAP002183 AgaP_AGAP008339 AgaP_AGAP011842	3	21	0.000564158	0.00902653	6	KEGG:Pathway
Ribosome	aga03010	AgaP_AGAP000541 AgaP_AGAP002407 AgaP_AGAP002754 AgaP_AGAP002921 AgaP_AGAP003217 AgaP_AGAP004818 AgaP_AGAP008405 AgaP_AGAP008773 AgaP_AGAP011946	9	133	0.000151071	0.00483428	6	KEGG:Pathway
Ribosome biogenesis in eukaryotes	aga03008	AgaP_AGAP001526 AgaP_AGAP005149 AgaP_AGAP007699 AgaP_AGAP008163	4	70	0.010029	0.0337847	6	KEGG:Pathway
RNA polymerase	aga03020	AgaP_AGAP007810 AgaP_AGAP010064	2	26	0.0126693	0.0337847	6	KEGG:Pathway
RNA transport	aga03013	AgaP_AGAP000082 AgaP_AGAP003089 AgaP_AGAP007668 AgaP_AGAP007699 AgaP_AGAP007781 AgaP_AGAP009570 AgaP_AGAP009989	7	120	0.00167891	0.0179083	6	KEGG:Pathway
2-Oxocarboxylic acid metabolism	aga01210	AgaP_AGAP003168 AgaP_AGAP004142 AgaP_AGAP007786 AgaP_AGAP009685 AgaP_AGAP012048	5	13	0.000432788	0.00466449	7	KEGG:Pathway
Biosynthesis of amino acids	aga01230	AgaP_AGAP001420 AgaP_AGAP002518 AgaP_AGAP002564 AgaP_AGAP003168 AgaP_AGAP004142 AgaP_AGAP004598 AgaP_AGAP006360 AgaP_AGAP007642 AgaP_AGAP007786 AgaP_AGAP008802 AgaP_AGAP009685 AgaP_AGAP011172 AgaP_AGAP011800 AgaP_AGAP012048	14	49	9.30627e-06	0.000150451	7	KEGG:Pathway
Carbon metabolism	aga01200	AgaP_AGAP000618 AgaP_AGAP001312 AgaP_AGAP001420 AgaP_AGAP001884 AgaP_AGAP002499 AgaP_AGAP002564 AgaP_AGAP003030 AgaP_AGAP003168 AgaP_AGAP004055 AgaP_AGAP004142 AgaP_AGAP004159 AgaP_AGAP004197 AgaP_AGAP004598 AgaP_AGAP004786 AgaP_AGAP005662 AgaP_AGAP007309 AgaP_AGAP007642 AgaP_AGAP007786 AgaP_AGAP007975 AgaP_AGAP008802 AgaP_AGAP009685 AgaP_AGAP010421 AgaP_AGAP010429 AgaP_AGAP010866 AgaP_AGAP011800…	27	82	4.98688e-11	4.81163e-09	7	KEGG:Pathway
Citrate cycle (TCA cycle)	aga00020	AgaP_AGAP000618 AgaP_AGAP001312 AgaP_AGAP001884 AgaP_AGAP003030 AgaP_AGAP003168 AgaP_AGAP004055 AgaP_AGAP004786 AgaP_AGAP007309 AgaP_AGAP007786 AgaP_AGAP007975 AgaP_AGAP010156 AgaP_AGAP010421 AgaP_AGAP010429 AgaP_AGAP012048	14	29	2.28441e-09	7.38627e-08	7	KEGG:Pathway
Fructose and mannose metabolism	aga00051	AgaP_AGAP002564 AgaP_AGAP003584 AgaP_AGAP007642 AgaP_AGAP011050 AgaP_AGAP011051 AgaP_AGAP011053	6	25	0.00443025	0.028649	7	KEGG:Pathway
Glycolysis / Gluconeogenesis	aga00010	AgaP_AGAP001420 AgaP_AGAP002564 AgaP_AGAP003030 AgaP_AGAP004786 AgaP_AGAP007642 AgaP_AGAP007975 AgaP_AGAP008802 AgaP_AGAP010421 AgaP_AGAP012167	9	32	0.000253316	0.00351024	7	KEGG:Pathway
Lipoic acid metabolism	aga00785	AgaP_AGAP010568 AgaP_AGAP012186	2	3	0.000667212	0.00647196	7	KEGG:Pathway
Metabolic pathways	aga01100	AgaP_AGAP000092 AgaP_AGAP000241 AgaP_AGAP000618 AgaP_AGAP000721 AgaP_AGAP000862 AgaP_AGAP001200 AgaP_AGAP001256 AgaP_AGAP001312 AgaP_AGAP001420 AgaP_AGAP001587 AgaP_AGAP001884 AgaP_AGAP001899 AgaP_AGAP002170 AgaP_AGAP002245 AgaP_AGAP002396 AgaP_AGAP002499 AgaP_AGAP002518 AgaP_AGAP002564 AgaP_AGAP002586 AgaP_AGAP002889 AgaP_AGAP003030 AgaP_AGAP003095 AgaP_AGAP003099 AgaP_AGAP003167 AgaP_AGAP003168…	105	783	3.1932e-08	7.74351e-07	7	KEGG:Pathway
Oxidative phosphorylation	aga00190	AgaP_AGAP000618 AgaP_AGAP000721 AgaP_AGAP001587 AgaP_AGAP002170 AgaP_AGAP002245 AgaP_AGAP002889 AgaP_AGAP003367 AgaP_AGAP003711 AgaP_AGAP004616 AgaP_AGAP004867 AgaP_AGAP005621 AgaP_AGAP006456 AgaP_AGAP006918 AgaP_AGAP007082 AgaP_AGAP007309 AgaP_AGAP007574 AgaP_AGAP008653 AgaP_AGAP008884 AgaP_AGAP009072 AgaP_AGAP009602 AgaP_AGAP009865 AgaP_AGAP010429 AgaP_AGAP010464 AgaP_AGAP011130 AgaP_AGAP011159…	26	113	6.17946e-07	1.19882e-05	7	KEGG:Pathway
Pentose phosphate pathway	aga00030	AgaP_AGAP002564 AgaP_AGAP004197 AgaP_AGAP007642 AgaP_AGAP010866 AgaP_AGAP011800 AgaP_AGAP012167	6	20	0.00104575	0.00922161	7	KEGG:Pathway
Phenylalanine, tyrosine and tryptophan biosynthesis	aga00400	AgaP_AGAP004142 AgaP_AGAP009685	2	4	0.00249537	0.0186193	7	KEGG:Pathway
Proteasome	aga03050	AgaP_AGAP001407 AgaP_AGAP001651 AgaP_AGAP001973 AgaP_AGAP001995 AgaP_AGAP002481 AgaP_AGAP002606 AgaP_AGAP003008 AgaP_AGAP004960 AgaP_AGAP005535 AgaP_AGAP007418 AgaP_AGAP008617 AgaP_AGAP008816 AgaP_AGAP008837 AgaP_AGAP009271 AgaP_AGAP009647 AgaP_AGAP010718 AgaP_AGAP011174 AgaP_AGAP011444	18	40	9.92088e-11	4.81163e-09	7	KEGG:Pathway
Protein processing in endoplasmic reticulum	aga04141	AgaP_AGAP000862 AgaP_AGAP001721 AgaP_AGAP001759 AgaP_AGAP001810 AgaP_AGAP002169 AgaP_AGAP002396 AgaP_AGAP005630 AgaP_AGAP007161 AgaP_AGAP007538 AgaP_AGAP007620 AgaP_AGAP008007 AgaP_AGAP008749 AgaP_AGAP008918 AgaP_AGAP009788 AgaP_AGAP010010 AgaP_AGAP010386 AgaP_AGAP010557 AgaP_AGAP010983 AgaP_AGAP011190 AgaP_AGAP011551	20	110	0.000396456	0.00466449	7	KEGG:Pathway
Starch and sucrose metabolism	aga00500	AgaP_AGAP001200 AgaP_AGAP002586 AgaP_AGAP010428 AgaP_AGAP012053 AgaP_AGAP012167	5	19	0.00436015	0.028649	7	KEGG:Pathway
Vitamin B6 metabolism	aga00750	AgaP_AGAP004598 AgaP_AGAP005929	2	4	0.00249537	0.0186193	7	KEGG:Pathway
Autophagy - other	aga04136	AgaP_AGAP005910 AgaP_AGAP010172	2	24	0.00496434	0.0209542	9	KEGG:Pathway
beta-Alanine metabolism	aga00410	AgaP_AGAP007784 AgaP_AGAP011833	2	18	0.0021287	0.0127722	9	KEGG:Pathway
Butanoate metabolism	aga00650	AgaP_AGAP007784 AgaP_AGAP011833	2	14	0.00098949	0.0102832	9	KEGG:Pathway
Fatty acid degradation	aga00071	AgaP_AGAP007784 AgaP_AGAP010130 AgaP_AGAP010164 AgaP_AGAP011833	4	28	4.26909e-05	0.00179302	9	KEGG:Pathway
Fatty acid elongation	aga00062	AgaP_AGAP007784 AgaP_AGAP011833	2	15	0.00122419	0.0102832	9	KEGG:Pathway
Fatty acid metabolism	aga01212	AgaP_AGAP005175 AgaP_AGAP007784 AgaP_AGAP010164 AgaP_AGAP011833	4	41	0.000282684	0.00395757	9	KEGG:Pathway
Lysine degradation	aga00310	AgaP_AGAP007784 AgaP_AGAP011833	2	31	0.0102621	0.0355974	9	KEGG:Pathway
Phagosome	aga04145	AgaP_AGAP004212 AgaP_AGAP007901 AgaP_AGAP010929	3	61	0.0118658	0.0355974	9	KEGG:Pathway
Propanoate metabolism	aga00640	AgaP_AGAP005175 AgaP_AGAP007784 AgaP_AGAP011833	3	19	0.000137954	0.00289703	9	KEGG:Pathway
Protein processing in endoplasmic reticulum	aga04141	AgaP_AGAP002076 AgaP_AGAP004098 AgaP_AGAP004212 AgaP_AGAP010174 AgaP_AGAP012407	5	110	0.00498909	0.0209542	9	KEGG:Pathway
Ribosome	aga03010	AgaP_AGAP003592 AgaP_AGAP003768 AgaP_AGAP008329 AgaP_AGAP009431 AgaP_AGAP010163 AgaP_AGAP011424	6	133	0.00288777	0.0151608	9	KEGG:Pathway
Tryptophan metabolism	aga00380	AgaP_AGAP007784 AgaP_AGAP011833	2	18	0.0021287	0.0127722	9	KEGG:Pathway
Valine, leucine and isoleucine degradation	aga00280	AgaP_AGAP007784 AgaP_AGAP011833	2	32	0.0112085	0.0355974	9	KEGG:Pathway
Drug metabolism - other enzymes	aga00983	AgaP_AGAP000163 AgaP_AGAP000188	2	43	0.0131685	0.0359141	10	KEGG:Pathway
Folate biosynthesis	aga00790	AgaP_AGAP006023 AgaP_AGAP006441 AgaP_AGAP008730	3	27	0.000225587	0.0033838	10	KEGG:Pathway
Glutathione metabolism	aga00480	AgaP_AGAP000163 AgaP_AGAP000885	2	54	0.0242695	0.048539	10	KEGG:Pathway
Glycine, serine and threonine metabolism	aga00260	AgaP_AGAP000162 AgaP_AGAP011948	2	30	0.00480128	0.025395	10	KEGG:Pathway
Hippo signaling pathway - fly	aga04391	AgaP_AGAP003873 AgaP_AGAP011515 AgaP_AGAP011516	3	54	0.00325921	0.0244441	10	KEGG:Pathway
Longevity regulating pathway - multiple species	aga04213	AgaP_AGAP002262 AgaP_AGAP010436	2	43	0.0131685	0.0359141	10	KEGG:Pathway
Lysosome	aga04142	AgaP_AGAP003934 AgaP_AGAP008584 AgaP_AGAP009695	3	71	0.00871469	0.0359141	10	KEGG:Pathway
Phagosome	aga04145	AgaP_AGAP002157 AgaP_AGAP011515 AgaP_AGAP011516	3	61	0.005079	0.025395	10	KEGG:Pathway
Phototransduction - fly	aga04745	AgaP_AGAP001506 AgaP_AGAP008435 AgaP_AGAP011515 AgaP_AGAP011516 AgaP_AGAP012171	5	29	6.12009e-07	1.83603e-05	10	KEGG:Pathway
Valine, leucine and isoleucine biosynthesis	aga00290	AgaP_AGAP000011 AgaP_AGAP003571	2	2	0	0	11	KEGG:Pathway
Basal transcription factors	aga03022	AgaP_AGAP002988 AgaP_AGAP003094 AgaP_AGAP003882 AgaP_AGAP004254 AgaP_AGAP005731 AgaP_AGAP006355 AgaP_AGAP008084 AgaP_AGAP008417 AgaP_AGAP008522 AgaP_AGAP008991 AgaP_AGAP010958 AgaP_AGAP011678	12	36	1.37967e-05	0.00136588	12	KEGG:Pathway
Base excision repair	aga03410	AgaP_AGAP002388 AgaP_AGAP002605 AgaP_AGAP003230 AgaP_AGAP004614 AgaP_AGAP008910 AgaP_AGAP009587	6	17	0.000591565	0.0146412	12	KEGG:Pathway
Glycosaminoglycan biosynthesis - heparan sulfate / heparin	aga00534	AgaP_AGAP001688 AgaP_AGAP002801 AgaP_AGAP005699 AgaP_AGAP005811 AgaP_AGAP006328 AgaP_AGAP008166	6	12	3.68467e-05	0.00182391	12	KEGG:Pathway
N-Glycan biosynthesis	aga00510	AgaP_AGAP001888 AgaP_AGAP002420 AgaP_AGAP002666 AgaP_AGAP002683 AgaP_AGAP003884 AgaP_AGAP004020 AgaP_AGAP005347 AgaP_AGAP008131 AgaP_AGAP012440	9	36	0.00152242	0.02512	12	KEGG:Pathway
Nucleotide excision repair	aga03420	AgaP_AGAP002805 AgaP_AGAP002988 AgaP_AGAP003093 AgaP_AGAP004614 AgaP_AGAP005144 AgaP_AGAP008417 AgaP_AGAP008522 AgaP_AGAP008910 AgaP_AGAP008939 AgaP_AGAP008991	10	39	0.000770437	0.0152547	12	KEGG:Pathway
RNA degradation	aga03018	AgaP_AGAP001686 AgaP_AGAP002177 AgaP_AGAP002348 AgaP_AGAP003182 AgaP_AGAP003279 AgaP_AGAP005136 AgaP_AGAP007147 AgaP_AGAP007626 AgaP_AGAP007827 AgaP_AGAP008239 AgaP_AGAP009674 AgaP_AGAP010538 AgaP_AGAP010712	13	54	0.00039152	0.0129202	12	KEGG:Pathway
Aminoacyl-tRNA biosynthesis	aga00970	AgaP_AGAP000012 AgaP_AGAP000398 AgaP_AGAP003527 AgaP_AGAP004057 AgaP_AGAP006997	5	65	0.010296	0.0489059	13	KEGG:Pathway
Apoptosis - multiple species	aga04215	AgaP_AGAP000240 AgaP_AGAP004921 AgaP_AGAP008420 AgaP_AGAP009460	4	19	0.000151261	0.00287396	13	KEGG:Pathway
DNA replication	aga03030	AgaP_AGAP001135 AgaP_AGAP001929 AgaP_AGAP004956 AgaP_AGAP005800 AgaP_AGAP006065 AgaP_AGAP008161 AgaP_AGAP009047 AgaP_AGAP010219	8	34	2.58659e-07	1.47436e-05	13	KEGG:Pathway
Fanconi anemia pathway	aga03460	AgaP_AGAP002259 AgaP_AGAP002967 AgaP_AGAP007126 AgaP_AGAP009655 AgaP_AGAP011769	5	27	8.82806e-05	0.002516	13	KEGG:Pathway
Homologous recombination	aga03440	AgaP_AGAP002967 AgaP_AGAP008748 AgaP_AGAP013180	3	24	0.00445226	0.0362541	13	KEGG:Pathway
mRNA surveillance pathway	aga03015	AgaP_AGAP002004 AgaP_AGAP002474 AgaP_AGAP003316 AgaP_AGAP010918 AgaP_AGAP011340	5	59	0.00644177	0.0407979	13	KEGG:Pathway
Nitrogen metabolism	aga00910	AgaP_AGAP002359 AgaP_AGAP002992 AgaP_AGAP005066	3	15	0.000697124	0.00993402	13	KEGG:Pathway
Other glycan degradation	aga00511	AgaP_AGAP004270 AgaP_AGAP007285	2	16	0.00997957	0.0489059	13	KEGG:Pathway
Pyrimidine metabolism	aga00240	AgaP_AGAP001929 AgaP_AGAP002375 AgaP_AGAP002394 AgaP_AGAP006065 AgaP_AGAP010791 AgaP_AGAP012122	6	71	0.00388694	0.0362541	13	KEGG:Pathway
RNA polymerase	aga03020	AgaP_AGAP002375 AgaP_AGAP002394 AgaP_AGAP012122	3	26	0.00599548	0.0407979	13	KEGG:Pathway
Thiamine metabolism	aga00730	AgaP_AGAP001684 AgaP_AGAP011302	2	12	0.00426146	0.0362541	13	KEGG:Pathway
Homologous recombination	aga03440	AgaP_AGAP006164 AgaP_AGAP006734 AgaP_AGAP006797 AgaP_AGAP008836	4	24	0.000669176	0.0237558	14	KEGG:Pathway
Neuroactive ligand-receptor interaction	aga04080	AgaP_AGAP000038 AgaP_AGAP000369 AgaP_AGAP000445 AgaP_AGAP004222 AgaP_AGAP005527 AgaP_AGAP007136 AgaP_AGAP008861 AgaP_AGAP009514	8	49	1.23672e-05	0.00087807	14	KEGG:Pathway
Non-homologous end-joining	aga03450	AgaP_AGAP000597 AgaP_AGAP006797	2	8	0.0014282	0.0338008	14	KEGG:Pathway
Alanine, aspartate and glutamate metabolism	aga00250	AgaP_AGAP000179 AgaP_AGAP005866	2	29	0.0105163	0.0473235	15	KEGG:Pathway
Fanconi anemia pathway	aga03460	AgaP_AGAP001404 AgaP_AGAP011675	2	27	0.00860735	0.0430367	15	KEGG:Pathway
Mannose type O-glycan biosynthesis	aga00515	AgaP_AGAP002674 AgaP_AGAP010784	2	3	3.84828e-06	0.000173173	15	KEGG:Pathway
Other glycan degradation	aga00511	AgaP_AGAP002055 AgaP_AGAP004032	2	16	0.00186282	0.0167654	15	KEGG:Pathway
Other types of O-glycan biosynthesis	aga00514	AgaP_AGAP002674 AgaP_AGAP004267 AgaP_AGAP010784	3	12	2.58558e-05	0.000581755	15	KEGG:Pathway
Phototransduction - fly	aga04745	AgaP_AGAP000945 AgaP_AGAP002145 AgaP_AGAP011414	3	29	0.00101776	0.0152664	15	KEGG:Pathway
Terpenoid backbone biosynthesis	aga00900	AgaP_AGAP000338 AgaP_AGAP004086	2	22	0.00479102	0.0322883	15	KEGG:Pathway
Glyoxylate and dicarboxylate metabolism	aga00630	AgaP_AGAP001065 AgaP_AGAP001903 AgaP_AGAP004904 AgaP_AGAP011329	4	24	0.000840621	0.0273202	MAGs Highly Variable	KEGG:Pathway
Oxidative phosphorylation	aga00190	AgaP_AGAP000851 AgaP_AGAP001711 AgaP_AGAP003879 AgaP_AGAP004400 AgaP_AGAP007297 AgaP_AGAP007966 AgaP_AGAP008727 AgaP_AGAP009491 AgaP_AGAP011829	9	113	0.00307104	0.0399235	MAGs Highly Variable	KEGG:Pathway
Protein export	aga03060	AgaP_AGAP009182 AgaP_AGAP010894 AgaP_AGAP011842	3	21	0.00407517	0.0441476	MAGs Highly Variable	KEGG:Pathway
Protein processing in endoplasmic reticulum	aga04141	AgaP_AGAP000044 AgaP_AGAP000733 AgaP_AGAP001424 AgaP_AGAP002076 AgaP_AGAP004294 AgaP_AGAP007393 AgaP_AGAP009182 AgaP_AGAP012407 AgaP_AGAP012463	9	110	0.00251263	0.0399235	MAGs Highly Variable	KEGG:Pathway
Ribosome	aga03010	AgaP_AGAP000541 AgaP_AGAP002407 AgaP_AGAP002754 AgaP_AGAP002921 AgaP_AGAP003592 AgaP_AGAP003768 AgaP_AGAP004919 AgaP_AGAP005131 AgaP_AGAP005947 AgaP_AGAP008329 AgaP_AGAP009431 AgaP_AGAP010163 AgaP_AGAP011424 AgaP_AGAP011635 AgaP_AGAP011896 AgaP_AGAP011946	16	133	6.01621e-07	3.91054e-05	MAGs Highly Variable	KEGG:Pathway
Tryptophan metabolism	aga00380	AgaP_AGAP004904 AgaP_AGAP011329 AgaP_AGAP011833	3	18	0.00224452	0.0399235	MAGs Highly Variable	KEGG:Pathway
Glyoxylate and dicarboxylate metabolism	aga00630	AgaP_AGAP001065 AgaP_AGAP001903 AgaP_AGAP004904 AgaP_AGAP011329	4	24	0.00134524	0.0464107	Testes Highly Variable	KEGG:Pathway
Oxidative phosphorylation	aga00190	AgaP_AGAP000851 AgaP_AGAP001711 AgaP_AGAP002245 AgaP_AGAP003879 AgaP_AGAP004616 AgaP_AGAP007297 AgaP_AGAP007966 AgaP_AGAP008727 AgaP_AGAP009491 AgaP_AGAP011829	10	113	0.00202823	0.0466494	Testes Highly Variable	KEGG:Pathway
Ribosome	aga03010	AgaP_AGAP000541 AgaP_AGAP000654 AgaP_AGAP000655 AgaP_AGAP002122 AgaP_AGAP002754 AgaP_AGAP003592 AgaP_AGAP003768 AgaP_AGAP004462 AgaP_AGAP004919 AgaP_AGAP005947 AgaP_AGAP008329 AgaP_AGAP008405 AgaP_AGAP009431 AgaP_AGAP010163 AgaP_AGAP011424 AgaP_AGAP011687 AgaP_AGAP011896	17	133	5.62561e-07	3.88167e-05	Testes Highly Variable	KEGG:Pathway
